# Supplementary material for: Integrated electromagnetic–circuit digital twin modelling for constraint-consistent optimal operation in heterogeneous multi-receiver wireless power transfer systems
Source: Sci Rep. 2026 Apr 29;16:19957. doi: 10.1038/s41598-026-50781-y (PMC13319240; doi:10.1038/s41598-026-50781-y)
Supplement: Supplementary file 1 — Supplementary Material 1 [file 41598_2026_50781_MOESM1_ESM.xlsx]

## Sheet: Sheet1
Iteration	Call Number
0	2	3.95935e-10	1.58374e-09	3.95935e-09	3.95935e-09	50	1	0.653887	-0.67077	0.983003	-0.983832	0.728412	-0.74166	90.2888
1	19	3.92858e-10	1.84881e-09	3.95942e-09	4.17598e-09	61.102	1	0.797685	-0.807554	0.960484	-0.962411	0.575379	-0.596093	34.6344
2	33	4.37471e-10	1.87073e-09	3.95939e-09	4.1097e-09	62.4232	1	0.596996	-0.616654	0.912945	-0.917192	-0.291267	0.228278	80.3936
3	47	4.5242e-10	1.90219e-09	3.95519e-09	4.54944e-09	62.914	1	-0.510695	0.437003	0.643004	-0.660418	-0.551917	0.476213	73.7019
4	61	4.48597e-10	1.96185e-09	3.95521e-09	4.67288e-09	62.9216	1	-0.393606	0.325625	0.590607	-0.610577	-0.425974	0.356414	59.1092
5	73	4.50827e-10	2.03667e-09	3.92056e-09	4.82391e-09	62.5518	1	0.369837	-0.400577	0.768715	-0.779997	0.332216	-0.364791	28.8961
6	75	4.48605e-10	1.96214e-09	3.95508e-09	4.67346e-09	62.9201	1	-0.42177	0.352415	0.581927	-0.602321	-0.454651	0.383693	59.5264
7	78	4.48605e-10	1.96214e-09	3.95508e-09	4.67346e-09	62.9201	1	-0.388483	0.320752	0.591709	-0.611626	-0.421004	0.351687	59.5264
8	95	4.44857e-10	2.01889e-09	3.95495e-09	4.81311e-09	62.9296	1	-0.412645	0.343735	0.508134	-0.532127	-0.446873	0.376294	52.6928
9	109	4.41229e-10	2.07953e-09	3.95497e-09	4.98469e-09	62.9345	1	-0.432169	0.362307	0.410949	-0.439683	-0.438908	0.368717	46.8548
10	123	4.41487e-10	2.1124e-09	3.9551e-09	5.06154e-09	62.9695	1.00099	-0.399043	0.330797	0.37875	-0.409055	-0.407224	0.338579	43.5608
11	137	4.40621e-10	2.15338e-09	3.95983e-09	5.15086e-09	63.3338	1.00741	-0.375703	0.308596	0.347533	-0.379361	-0.373199	0.306214	40.6331
12	151	4.39515e-10	2.19336e-09	3.95987e-09	5.24778e-09	63.3236	1.00828	-0.342394	0.276912	0.306696	-0.340515	-0.343007	0.277495	37.7847
13	165	4.38607e-10	2.24292e-09	3.96099e-09	5.37767e-09	63.3707	1.0086	-0.303009	0.239448	0.250829	-0.287374	-0.301915	0.238407	34.714
14	179	4.37242e-10	2.3009e-09	3.96062e-09	5.5146e-09	63.3738	1.00979	-0.263994	0.202336	0.19609	-0.235305	-0.262674	0.20108	31.8505
15	193	4.39627e-10	2.3517e-09	3.89247e-09	5.63037e-09	62.003	1.00929	-0.191599	0.133472	0.118889	-0.16187	-0.215582	0.156285	29.1588
16	207	4.39056e-10	2.48283e-09	3.89175e-09	5.9955e-09	61.8714	1.00968	-0.0999529	0.0462966	-0.0259698	-0.0240775	-0.0909265	0.0377106	25.4066
17	220	4.39416e-10	2.48289e-09	3.89175e-09	5.99553e-09	61.8706	1.00968	0.00174425	-0.0504397	0.0691212	-0.11453	0.0102497	-0.0585302	23.7104
18	234	4.39345e-10	2.49324e-09	3.89205e-09	5.99512e-09	61.8697	1.00968	0.00558079	-0.054089	0.057086	-0.103082	0.00386654	-0.0524584	23.643
19	263	4.23404e-10	2.36809e-09	3.84223e-09	5.77143e-09	52.2105	1.0001	0.00903833	-0.0573779	0.00883088	-0.0571806	0.00837621	-0.0567481	30.5299
20	278	4.2305e-10	2.34656e-09	3.82323e-09	5.75069e-09	51.0006	1	0.00700484	-0.0554436	0.00662489	-0.0550822	0.00687596	-0.055321	31.4473
21	292	4.23033e-10	2.34599e-09	3.82318e-09	5.75035e-09	50.9879	1	0.00748011	-0.0558957	0.00693604	-0.0553782	0.00747042	-0.0558865	31.4591
22	310	4.20328e-10	2.28276e-09	3.81569e-09	5.53637e-09	48.8866	1	0.0395164	-0.0863692	0.00523201	-0.0537573	0.0538436	-0.0999976	34.2651
23	328	4.22168e-10	2.21768e-09	3.76414e-09	5.45737e-09	46.3346	1	0.00338135	-0.0519969	0.00491187	-0.0534528	0.0324262	-0.0796249	37.7933
24	344	4.18087e-10	2.19238e-09	3.69902e-09	5.30966e-09	44.1828	1	0.004396	-0.0529621	0.05089	-0.097188	0.026904	-0.0743721	40.3365
25	364	4.16836e-10	2.18266e-09	3.69863e-09	5.24094e-09	43.7259	1	0.00187432	-0.0505634	0.00210977	-0.0507873	0.00353014	-0.0521384	41.873
26	399	4.42649e-10	2.00791e-09	3.70214e-09	4.82459e-09	35.6914	1.00225	-0.0199324	-0.0298204	0.000686032	-0.0494331	-0.0220367	-0.0278188	62.4993
27	418	4.41908e-10	1.9893e-09	3.69455e-09	4.77285e-09	34.7794	1.0001	-0.0238813	-0.0260642	0.0246856	-0.0722619	-0.026256	-0.0238052	65.4574
28	439	4.39291e-10	1.9707e-09	3.69467e-09	4.73077e-09	34.3743	1.0001	-0.0307479	-0.0195325	0.0199156	-0.0677246	-0.0297641	-0.0204683	68.3728
29	461	4.38046e-10	1.9537e-09	3.69642e-09	4.68235e-09	33.9183	1.00016	-0.0395347	-0.0111744	0.0114442	-0.0596664	-0.0392611	-0.0114345	71.7839
30	478	4.37763e-10	1.94718e-09	3.69651e-09	4.67373e-09	33.8223	1.00016	-0.0399227	-0.0108052	0.0100623	-0.058352	-0.040663	-0.010101	72.2207
31	497	4.37488e-10	1.94487e-09	3.69657e-09	4.66866e-09	33.7697	1.00015	-0.0441867	-0.00674921	0.00670192	-0.0551555	-0.0444496	-0.00649919	72.6308
32	512	4.37352e-10	1.94413e-09	3.69609e-09	4.66866e-09	33.7595	1.00013	-0.0466674	-0.00438953	0.0031085	-0.0517374	-0.0448793	-0.00609047	72.7118
33	543	4.3725e-10	1.94386e-09	3.69613e-09	4.66736e-09	33.7514	1.00013	-0.0469094	-0.00415936	0.00257533	-0.0512302	-0.0461974	-0.00483659	72.738
