# Supplementary material for: Integrated electromagnetic–circuit digital twin modelling for constraint-consistent optimal operation in heterogeneous multi-receiver wireless power transfer systems
Source: Sci Rep. 2026 Apr 29;16:19957. doi: 10.1038/s41598-026-50781-y (PMC13319240; doi:10.1038/s41598-026-50781-y)
Supplement: Supplementary file 2 — Supplementary Material 2 [file 41598_2026_50781_MOESM2_ESM.xlsx]

## Sheet: Sheet1
Call Number
1	3.95935e-10	1.58374e-09	3.95935e-09	3.95935e-09	50	1	0.653703	-0.670595	0.982995	-0.983824	0.728264	-0.741519	90.2888
2	3.95935e-10	1.58374e-09	3.95935e-09	3.95935e-09	50	1	0.653887	-0.67077	0.983003	-0.983832	0.728412	-0.74166	90.2861
3	3.95935e-10	1.58374e-09	3.95935e-09	3.95935e-09	50	1	0.654026	-0.670902	0.982853	-0.983689	0.727874	-0.741148	90.2417
4	3.95935e-10	1.58374e-09	3.95935e-09	3.95935e-09	50	1	0.653703	-0.670595	0.983003	-0.983832	0.728264	-0.741519	90.2888
5	3.95935e-10	1.58374e-09	3.95935e-09	3.95935e-09	50	1	0.653776	-0.670665	0.982959	-0.98379	0.728443	-0.741689	90.2811
6	3.96331e-10	1.58374e-09	3.95935e-09	3.95935e-09	50	1	0.653715	-0.670607	0.982995	-0.983824	0.728277	-0.741532	90.2857
7	3.95935e-10	1.58532e-09	3.95935e-09	3.95935e-09	50	1	0.653849	-0.670734	0.982848	-0.983684	0.727619	-0.740906	90.3161
8	3.95935e-10	1.58374e-09	3.96331e-09	3.95935e-09	50	1	0.653703	-0.670595	0.982995	-0.983824	0.728264	-0.741519	90.2888
9	3.95935e-10	1.58374e-09	3.95935e-09	3.96331e-09	50	1	0.65371	-0.670602	0.982958	-0.983789	0.72852	-0.741763	90.2814
10	3.95935e-10	1.58374e-09	3.95935e-09	3.95935e-09	50.05	1	0.653356	-0.670266	0.982978	-0.983808	0.727992	-0.741261	90.2888
11	3.95935e-10	1.58374e-09	3.95935e-09	3.95935e-09	50	1.001	0.653703	-0.670596	0.982995	-0.983824	0.728264	-0.74152	90.2887
12	3.95874e-10	1.58899e-09	3.95935e-09	3.96364e-09	50.2199	1	0.652746	-0.669686	0.982235	-0.983101	0.724054	-0.737515	90.1488
13	3.95776e-10	1.59749e-09	3.95936e-09	3.97058e-09	50.5756	1	0.652082	-0.669053	0.980943	-0.981873	0.713884	-0.727841	89.3924
14	3.95517e-10	1.61972e-09	3.95936e-09	3.98876e-09	51.5071	1	0.656206	-0.672976	0.977402	-0.978505	0.674198	-0.69009	84.5826
15	3.94841e-10	1.67794e-09	3.95938e-09	4.03634e-09	53.9455	1	0.690023	-0.705143	0.969234	-0.970735	0.570468	-0.591421	68.6962
16	3.93072e-10	1.83037e-09	3.95941e-09	4.1609e-09	60.3295	1	0.788738	-0.799044	0.960742	-0.962657	0.564416	-0.585664	37.532
17	3.88438e-10	2.22942e-09	3.95951e-09	4.48702e-09	77.0429	1	0.911298	-0.915624	0.968311	-0.969857	0.801785	-0.811454	7.04246
18	3.92858e-10	1.84881e-09	3.95942e-09	4.17598e-09	61.102	1	0.798241	-0.808083	0.960592	-0.962514	0.57652	-0.597178	34.6344
19	3.92858e-10	1.84881e-09	3.95942e-09	4.17598e-09	61.102	1	0.797685	-0.807554	0.960484	-0.962411	0.575379	-0.596093	34.7187
20	3.92858e-10	1.84881e-09	3.95942e-09	4.17598e-09	61.102	1	0.798899	-0.808709	0.960552	-0.962476	0.575915	-0.596602	34.5708
21	3.92858e-10	1.84881e-09	3.95942e-09	4.17598e-09	61.102	1	0.798241	-0.808083	0.960611	-0.962533	0.57652	-0.597178	34.6342
22	3.92858e-10	1.84881e-09	3.95942e-09	4.17598e-09	61.102	1	0.798047	-0.807898	0.960569	-0.962493	0.579728	-0.600229	34.3532
23	3.9325e-10	1.84881e-09	3.95942e-09	4.17598e-09	61.102	1	0.797584	-0.807458	0.960464	-0.962392	0.575168	-0.595891	34.7184
24	3.92858e-10	1.85066e-09	3.95942e-09	4.17598e-09	61.102	1	0.798806	-0.80862	0.960552	-0.962477	0.575919	-0.596606	34.5783
25	3.92858e-10	1.84881e-09	3.96338e-09	4.17598e-09	61.102	1	0.798241	-0.808083	0.960592	-0.962514	0.57652	-0.597178	34.6344
26	3.92858e-10	1.84881e-09	3.95942e-09	4.18015e-09	61.102	1	0.798016	-0.807869	0.960565	-0.962489	0.579655	-0.60016	34.3528
27	3.92858e-10	1.84881e-09	3.95942e-09	4.17598e-09	61.1631	1	0.798044	-0.807896	0.960554	-0.962479	0.576153	-0.596829	34.6236
28	3.92858e-10	1.84881e-09	3.95942e-09	4.17598e-09	61.102	1.001	0.798242	-0.808084	0.960592	-0.962514	0.576535	-0.597192	34.6313
29	6.13512e-10	1.95721e-09	3.95928e-09	3.84816e-09	67.6366	1	0.924346	-0.928037	0.981168	-0.982086	0.842632	-0.850309	10.9345
30	4.36988e-10	1.87049e-09	3.95939e-09	4.11041e-09	62.4089	1	0.600169	-0.619673	0.913727	-0.917935	-0.27557	0.213347	79.9754
31	4.9606e-10	1.89951e-09	3.95935e-09	4.02265e-09	64.1583	1	0.813224	-0.822335	0.960244	-0.962183	0.257038	-0.29328	59.2687
32	4.37471e-10	1.87073e-09	3.95939e-09	4.1097e-09	62.4232	1	0.598105	-0.617709	0.913193	-0.917427	-0.287277	0.224483	80.3936
33	4.37471e-10	1.87073e-09	3.95939e-09	4.1097e-09	62.4232	1	0.596996	-0.616654	0.912945	-0.917192	-0.291267	0.228278	80.5892
34	4.37471e-10	1.87073e-09	3.95939e-09	4.1097e-09	62.4232	1	0.598809	-0.618379	0.913002	-0.917246	-0.290778	0.227813	80.453
35	4.37471e-10	1.87073e-09	3.95939e-09	4.1097e-09	62.4232	1	0.598134	-0.617738	0.913239	-0.917471	-0.287386	0.224587	80.419
36	4.37471e-10	1.87073e-09	3.95939e-09	4.1097e-09	62.4232	1	0.59617	-0.615869	0.912711	-0.916969	-0.283532	0.220921	80.0632
37	4.37908e-10	1.87073e-09	3.95939e-09	4.1097e-09	62.4232	1	0.596782	-0.616451	0.912901	-0.917149	-0.291856	0.228839	80.578
38	4.37471e-10	1.8726e-09	3.95939e-09	4.1097e-09	62.4232	1	0.598681	-0.618257	0.913012	-0.917255	-0.290738	0.227775	80.4738
39	4.37471e-10	1.87073e-09	3.96335e-09	4.1097e-09	62.4232	1	0.59814	-0.617743	0.913196	-0.917431	-0.287398	0.224598	80.4226
40	4.37471e-10	1.87073e-09	3.95939e-09	4.11381e-09	62.4232	1	0.595977	-0.615685	0.912674	-0.916933	-0.284145	0.221503	80.1131
41	4.37471e-10	1.87073e-09	3.95939e-09	4.1097e-09	62.4856	1	0.597714	-0.617338	0.913107	-0.917346	-0.28861	0.225751	80.4042
42	4.37471e-10	1.87073e-09	3.95939e-09	4.1097e-09	62.4232	1.001	0.598132	-0.617735	0.913196	-0.91743	-0.28736	0.224562	80.4144
43	4.61048e-10	1.92035e-09	3.95277e-09	4.80326e-09	63.1973	1	0.310822	-0.344441	0.827204	-0.835633	0.456575	-0.483084	38.1019
44	4.42186e-10	1.88065e-09	3.95806e-09	4.24841e-09	62.578	1	0.306087	-0.339936	0.844671	-0.852248	-0.336011	0.270839	69.8966
45	4.5242e-10	1.90219e-09	3.95519e-09	4.54944e-09	62.914	1	-0.531625	0.456912	0.637917	-0.65558	-0.573456	0.496702	73.7019
46	4.53771e-10	1.90503e-09	3.95481e-09	4.58921e-09	62.9584	1	-0.35801	0.291766	0.676044	-0.691846	-0.325436	0.26078	67.1558
47	4.5242e-10	1.90219e-09	3.95519e-09	4.54944e-09	62.914	1	-0.510695	0.437003	0.643004	-0.660418	-0.551917	0.476213	73.1642
48	4.5242e-10	1.90219e-09	3.95519e-09	4.54944e-09	62.914	1	-0.523738	0.44941	0.638542	-0.656174	-0.571073	0.494436	73.358
49	4.5242e-10	1.90219e-09	3.95519e-09	4.54944e-09	62.914	1	-0.531641	0.456927	0.638094	-0.655748	-0.573472	0.496718	73.7016
50	4.5242e-10	1.90219e-09	3.95519e-09	4.54944e-09	62.914	1	-0.531318	0.45662	0.638019	-0.655677	-0.566953	0.490517	73.5256
51	4.52872e-10	1.90219e-09	3.95519e-09	4.54944e-09	62.914	1	-0.511286	0.437564	0.642816	-0.660239	-0.552518	0.476785	73.1498
52	4.5242e-10	1.90409e-09	3.95519e-09	4.54944e-09	62.914	1	-0.52372	0.449392	0.638726	-0.656349	-0.570322	0.493721	73.3699
53	4.5242e-10	1.90219e-09	3.95915e-09	4.54944e-09	62.914	1	-0.531625	0.456912	0.637917	-0.655579	-0.573456	0.496702	73.7019
54	4.5242e-10	1.90219e-09	3.95519e-09	4.55399e-09	62.914	1	-0.531323	0.456624	0.638181	-0.65583	-0.567659	0.491188	73.5846
55	4.5242e-10	1.90219e-09	3.95519e-09	4.54944e-09	62.9769	1	-0.533157	0.458369	0.637555	-0.655235	-0.575029	0.498199	73.702
56	4.5242e-10	1.90219e-09	3.95519e-09	4.54944e-09	62.914	1.001	-0.5316	0.456888	0.637994	-0.655653	-0.573384	0.496633	73.6622
57	4.41303e-10	2.0757e-09	3.95525e-09	4.9084e-09	62.936	1	-1.31642	1.20343	0.0794693	-0.124373	-1.35403	1.2392	60.9059
58	4.50196e-10	1.93689e-09	3.9552e-09	4.62123e-09	62.9184	1	-0.44886	0.378184	0.608857	-0.627937	-0.484697	0.412273	64.4543
59	4.50443e-10	1.93305e-09	3.9552e-09	4.61328e-09	62.9179	1	-0.456145	0.385114	0.612109	-0.631031	-0.492843	0.420021	65.3764
60	4.48597e-10	1.96185e-09	3.95521e-09	4.67288e-09	62.9216	1	-0.417441	0.348297	0.583525	-0.603841	-0.45045	0.379696	59.1092
61	4.48597e-10	1.96185e-09	3.95521e-09	4.67288e-09	62.9216	1	-0.393606	0.325625	0.590607	-0.610577	-0.425974	0.356414	58.8346
62	4.48597e-10	1.96185e-09	3.95521e-09	4.67288e-09	62.9216	1	-0.418031	0.348858	0.5823	-0.602676	-0.454795	0.383829	59.4124
63	4.48597e-10	1.96185e-09	3.95521e-09	4.67288e-09	62.9216	1	-0.426805	0.357205	0.581026	-0.601464	-0.459936	0.388719	59.7029
64	4.48597e-10	1.96185e-09	3.95521e-09	4.67288e-09	62.9216	1	-0.425581	0.35604	0.581258	-0.601684	-0.453766	0.38285	59.587
65	4.49045e-10	1.96185e-09	3.95521e-09	4.67288e-09	62.9216	1	-0.394221	0.32621	0.590425	-0.610405	-0.426606	0.357016	58.8293
66	4.48597e-10	1.96382e-09	3.95521e-09	4.67288e-09	62.9216	1	-0.418275	0.34909	0.582431	-0.602801	-0.454341	0.383398	59.4279
67	4.48597e-10	1.96185e-09	3.95917e-09	4.67288e-09	62.9216	1	-0.426794	0.357194	0.580821	-0.601268	-0.459923	0.388707	59.7038
68	4.48597e-10	1.96185e-09	3.95521e-09	4.67755e-09	62.9216	1	-0.425385	0.355854	0.581316	-0.60174	-0.454254	0.383315	59.5931
69	4.48597e-10	1.96185e-09	3.95521e-09	4.67288e-09	62.9845	1	-0.428392	0.358714	0.580369	-0.600839	-0.461379	0.390092	59.7241
70	4.48597e-10	1.96185e-09	3.95521e-09	4.67288e-09	62.9216	1.001	-0.426785	0.357185	0.580826	-0.601273	-0.459894	0.388679	59.7087
71	4.62686e-10	2.43261e-09	3.7372e-09	5.62188e-09	60.5943	1	0.878305	-0.884242	0.910227	-0.914606	0.864084	-0.870714	4.3309
72	4.51415e-10	2.056e-09	3.91161e-09	4.86268e-09	62.4561	1	0.460921	-0.487217	0.79216	-0.802298	0.425035	-0.453083	24.6218
73	4.50827e-10	2.03667e-09	3.92056e-09	4.82391e-09	62.5518	1	0.369837	-0.400577	0.768715	-0.779997	0.332216	-0.364791	28.8961
74	4.49043e-10	1.97682e-09	3.94828e-09	4.70309e-09	62.8476	1	-0.180027	0.122464	0.635834	-0.653598	-0.217826	0.15842	51.3257
75	4.48605e-10	1.96214e-09	3.95508e-09	4.67346e-09	62.9201	1	-0.42177	0.352415	0.581927	-0.602321	-0.454651	0.383693	59.5264
76	4.48619e-10	1.96261e-09	3.95486e-09	4.67441e-09	62.9178	1	-0.413363	0.344418	0.583742	-0.604047	-0.446461	0.375902	59.2585
77	4.48608e-10	1.96222e-09	3.95504e-09	4.67362e-09	62.9198	1	-0.420369	0.351082	0.582229	-0.602608	-0.453284	0.382392	59.4813
78	4.48605e-10	1.96214e-09	3.95508e-09	4.67346e-09	62.9201	1	-0.388483	0.320752	0.591709	-0.611626	-0.421004	0.351687	58.6666
79	4.48605e-10	1.96214e-09	3.95508e-09	4.67346e-09	62.9201	1	-0.412847	0.343927	0.58342	-0.603741	-0.449742	0.379023	59.2502
80	4.48605e-10	1.96214e-09	3.95508e-09	4.67346e-09	62.9201	1	-0.42178	0.352424	0.582134	-0.602518	-0.45465	0.383692	59.5236
81	4.48605e-10	1.96214e-09	3.95508e-09	4.67346e-09	62.9201	1	-0.420346	0.351061	0.582391	-0.602762	-0.448646	0.37798	59.4127
82	4.49054e-10	1.96214e-09	3.95508e-09	4.67346e-09	62.9201	1	-0.389086	0.321325	0.591525	-0.61145	-0.421641	0.352293	58.6605
83	4.48605e-10	1.96411e-09	3.95508e-09	4.67346e-09	62.9201	1	-0.413091	0.34416	0.583551	-0.603865	-0.449287	0.37859	59.2647
84	4.48605e-10	1.96214e-09	3.95903e-09	4.67346e-09	62.9201	1	-0.421773	0.352419	0.581925	-0.602319	-0.454661	0.383702	59.5277
85	4.48605e-10	1.96214e-09	3.95508e-09	4.67814e-09	62.9201	1	-0.420172	0.350895	0.58244	-0.602808	-0.449197	0.378504	59.4276
86	4.48605e-10	1.96214e-09	3.95508e-09	4.67346e-09	62.9831	1	-0.42319	0.353766	0.58151	-0.601924	-0.456098	0.385069	59.5253
87	4.48605e-10	1.96214e-09	3.95508e-09	4.67346e-09	62.9201	1.001	-0.421739	0.352386	0.581935	-0.602329	-0.454626	0.383669	59.5256
88	4.48558e-10	1.96287e-09	3.95507e-09	4.67525e-09	62.9203	1	-0.420517	0.351223	0.581297	-0.601722	-0.453396	0.382499	59.3845
89	4.4848e-10	1.96404e-09	3.95507e-09	4.67813e-09	62.9205	1	-0.418569	0.34937	0.58026	-0.600735	-0.451441	0.380639	59.1574
90	4.48277e-10	1.96711e-09	3.95507e-09	4.68569e-09	62.921	1	-0.413683	0.344723	0.577517	-0.598126	-0.446878	0.376298	58.5309
91	4.47746e-10	1.97515e-09	3.95505e-09	4.70548e-09	62.9223	1	-0.405069	0.336529	0.569196	-0.590211	-0.438612	0.368436	57.1467
92	4.46355e-10	1.9962e-09	3.955e-09	4.75728e-09	62.9258	1	-0.407931	0.339251	0.539941	-0.562383	-0.441643	0.371318	54.3626
93	4.42715e-10	2.0513e-09	3.95488e-09	4.89289e-09	62.935	1	-0.628325	0.548895	0.383767	-0.413827	-0.668976	0.587562	52.6904
94	4.44857e-10	2.01889e-09	3.95495e-09	4.81311e-09	62.9296	1	-0.455992	0.384968	0.492955	-0.517689	-0.491797	0.419026	52.6928
95	4.44857e-10	2.01889e-09	3.95495e-09	4.81311e-09	62.9296	1	-0.412645	0.343735	0.508134	-0.532127	-0.446873	0.376294	51.774
96	4.44857e-10	2.01889e-09	3.95495e-09	4.81311e-09	62.9296	1	-0.447516	0.376905	0.494718	-0.519366	-0.486902	0.41437	52.4517
97	4.44857e-10	2.01889e-09	3.95495e-09	4.81311e-09	62.9296	1	-0.456128	0.385098	0.493318	-0.518035	-0.491942	0.419164	52.7288
98	4.44857e-10	2.01889e-09	3.95495e-09	4.81311e-09	62.9296	1	-0.454463	0.383514	0.49352	-0.518226	-0.486403	0.413896	52.6024
99	4.45301e-10	2.01889e-09	3.95495e-09	4.81311e-09	62.9296	1	-0.413303	0.344361	0.50794	-0.531943	-0.447533	0.376921	51.7882
100	4.44857e-10	2.02091e-09	3.95495e-09	4.81311e-09	62.9296	1	-0.44788	0.377251	0.494841	-0.519483	-0.486536	0.414022	52.4697
101	4.44857e-10	2.01889e-09	3.95891e-09	4.81311e-09	62.9296	1	-0.455996	0.384972	0.492955	-0.517689	-0.491795	0.419025	52.693
102	4.44857e-10	2.01889e-09	3.95495e-09	4.81793e-09	62.9296	1	-0.454313	0.383371	0.493575	-0.518278	-0.486948	0.414414	52.6096
103	4.44857e-10	2.01889e-09	3.95495e-09	4.81311e-09	62.9925	1	-0.457448	0.386353	0.492448	-0.517207	-0.493289	0.420445	52.6928
104	4.44857e-10	2.01889e-09	3.95495e-09	4.81311e-09	62.9296	1.001	-0.456066	0.385038	0.493081	-0.517809	-0.491887	0.419112	52.7262
105	4.36708e-10	2.15508e-09	3.95498e-09	5.19846e-09	62.9405	1	-1.01333	0.91512	0.010093	-0.0583812	-0.991832	0.89467	49.1419
106	4.43227e-10	2.04613e-09	3.95496e-09	4.89018e-09	62.9318	1	-0.436929	0.366835	0.458987	-0.485378	-0.45777	0.386659	49.1573
107	4.43107e-10	2.04814e-09	3.95496e-09	4.89587e-09	62.9319	1	-0.437533	0.36741	0.455726	-0.482276	-0.457532	0.386433	48.9571
108	4.41229e-10	2.07953e-09	3.95497e-09	4.98469e-09	62.9345	1	-0.486556	0.414041	0.388329	-0.418166	-0.49405	0.421169	46.8548
109	4.41229e-10	2.07953e-09	3.95497e-09	4.98469e-09	62.9345	1	-0.432169	0.362307	0.410949	-0.439683	-0.438908	0.368717	45.7833
110	4.41229e-10	2.07953e-09	3.95497e-09	4.98469e-09	62.9345	1	-0.479116	0.406964	0.390241	-0.419985	-0.48927	0.416622	46.6727
111	4.41229e-10	2.07953e-09	3.95497e-09	4.98469e-09	62.9345	1	-0.486785	0.414259	0.388591	-0.418416	-0.493898	0.421025	46.8579
112	4.41229e-10	2.07953e-09	3.95497e-09	4.98469e-09	62.9345	1	-0.485073	0.41263	0.388891	-0.418701	-0.489383	0.41673	46.7983
113	4.4167e-10	2.07953e-09	3.95497e-09	4.98469e-09	62.9345	1	-0.432603	0.36272	0.410581	-0.439333	-0.439727	0.369497	45.7663
114	4.41229e-10	2.08161e-09	3.95497e-09	4.98469e-09	62.9345	1	-0.479546	0.407373	0.390363	-0.420102	-0.488973	0.41634	46.69
115	4.41229e-10	2.07953e-09	3.95892e-09	4.98469e-09	62.9345	1	-0.486557	0.414042	0.388328	-0.418166	-0.494051	0.42117	46.8549
116	4.41229e-10	2.07953e-09	3.95497e-09	4.98967e-09	62.9345	1	-0.484967	0.41253	0.388988	-0.418793	-0.489986	0.417304	46.7904
117	4.41229e-10	2.07953e-09	3.95497e-09	4.98469e-09	62.9974	1	-0.488251	0.415653	0.387681	-0.41755	-0.495376	0.422431	46.8592
118	4.41229e-10	2.07953e-09	3.95497e-09	4.98469e-09	62.9345	1.001	-0.48672	0.414197	0.388313	-0.418151	-0.493833	0.420963	46.8566
119	4.4349e-10	2.36762e-09	3.9561e-09	5.65828e-09	63.2416	1.00866	-1.04505	0.945295	-0.426407	0.356826	-1.06529	0.964542	38.1057
120	4.41681e-10	2.13715e-09	3.95519e-09	5.11941e-09	62.9959	1.00173	-0.468857	0.397205	0.311699	-0.345274	-0.479292	0.407132	41.9787
121	4.41558e-10	2.12152e-09	3.95513e-09	5.08287e-09	62.9792	1.00126	-0.457412	0.386319	0.339742	-0.371949	-0.467004	0.395442	42.8926
122	4.41487e-10	2.1124e-09	3.9551e-09	5.06154e-09	62.9695	1.00099	-0.456388	0.385345	0.353425	-0.384965	-0.465389	0.393907	43.5608
123	4.41487e-10	2.1124e-09	3.9551e-09	5.06154e-09	62.9695	1.00099	-0.399043	0.330797	0.37875	-0.409055	-0.407224	0.338579	42.4739
124	4.41487e-10	2.1124e-09	3.9551e-09	5.06154e-09	62.9695	1.00099	-0.449327	0.378628	0.355348	-0.386794	-0.461159	0.389883	43.3917
125	4.41487e-10	2.1124e-09	3.9551e-09	5.06154e-09	62.9695	1.00099	-0.456536	0.385486	0.353613	-0.385144	-0.465213	0.393739	43.5806
126	4.41487e-10	2.1124e-09	3.9551e-09	5.06154e-09	62.9695	1.00099	-0.455033	0.384056	0.354043	-0.385553	-0.461108	0.389835	43.4967
127	4.41928e-10	2.1124e-09	3.9551e-09	5.06154e-09	62.9695	1.00099	-0.399641	0.331366	0.378486	-0.408804	-0.407819	0.339145	42.4685
128	4.41487e-10	2.11451e-09	3.9551e-09	5.06154e-09	62.9695	1.00099	-0.449614	0.378901	0.355293	-0.386742	-0.460927	0.389662	43.3908
129	4.41487e-10	2.1124e-09	3.95905e-09	5.06154e-09	62.9695	1.00099	-0.456415	0.38537	0.353404	-0.384945	-0.465371	0.393889	43.5641
130	4.41487e-10	2.1124e-09	3.9551e-09	5.0666e-09	62.9695	1.00099	-0.454929	0.383957	0.354094	-0.385602	-0.46171	0.390407	43.5039
131	4.41487e-10	2.1124e-09	3.9551e-09	5.06154e-09	63.0325	1.00099	-0.457974	0.386853	0.352651	-0.384229	-0.466659	0.395115	43.5821
132	4.41487e-10	2.1124e-09	3.9551e-09	5.06154e-09	62.9695	1.00199	-0.456449	0.385402	0.353347	-0.384891	-0.465212	0.393738	43.5744
133	4.35484e-10	2.39671e-09	3.98797e-09	5.68121e-09	65.4971	1.04554	-1.474	1.35332	-0.601323	0.523209	-1.39638	1.27949	42.3787
134	4.40286e-10	2.16926e-09	3.96167e-09	5.18547e-09	63.475	1.0099	-0.44037	0.370108	0.300101	-0.334243	-0.433754	0.363815	39.8434
135	4.40621e-10	2.15338e-09	3.95983e-09	5.15086e-09	63.3338	1.00741	-0.435917	0.365872	0.31889	-0.352115	-0.43305	0.363145	40.6331
136	4.40622e-10	2.15334e-09	3.95983e-09	5.15078e-09	63.3335	1.0074	-0.43592	0.365875	0.318929	-0.352152	-0.433046	0.363142	40.6352
137	4.40621e-10	2.15338e-09	3.95983e-09	5.15086e-09	63.3338	1.00741	-0.375703	0.308596	0.347533	-0.379361	-0.373199	0.306214	39.5479
138	4.40621e-10	2.15338e-09	3.95983e-09	5.15086e-09	63.3338	1.00741	-0.429456	0.359726	0.320786	-0.353918	-0.429125	0.359411	40.4855
139	4.40621e-10	2.15338e-09	3.95983e-09	5.15086e-09	63.3338	1.00741	-0.43597	0.365922	0.319214	-0.352423	-0.43299	0.363088	40.6318
140	4.40621e-10	2.15338e-09	3.95983e-09	5.15086e-09	63.3338	1.00741	-0.434704	0.364718	0.319494	-0.35269	-0.429107	0.359394	40.5788
141	4.41062e-10	2.15338e-09	3.95983e-09	5.15086e-09	63.3338	1.00741	-0.376272	0.309137	0.347267	-0.379108	-0.373797	0.306783	39.5422
142	4.40621e-10	2.15553e-09	3.95983e-09	5.15086e-09	63.3338	1.00741	-0.429955	0.360201	0.320888	-0.354016	-0.428867	0.359166	40.5023
143	4.40621e-10	2.15338e-09	3.96379e-09	5.15086e-09	63.3338	1.00741	-0.435917	0.365872	0.318889	-0.352114	-0.433053	0.363148	40.6331
144	4.40621e-10	2.15338e-09	3.95983e-09	5.15601e-09	63.3338	1.00741	-0.434615	0.364634	0.319538	-0.352731	-0.42971	0.359968	40.5855
145	4.40621e-10	2.15338e-09	3.95983e-09	5.15086e-09	63.3972	1.00741	-0.437354	0.367239	0.318209	-0.351467	-0.434481	0.364507	40.6331
146	4.40621e-10	2.15338e-09	3.95983e-09	5.15086e-09	63.3338	1.00842	-0.435898	0.365854	0.318907	-0.352131	-0.432944	0.363045	40.631
147	4.36143e-10	2.31531e-09	3.95998e-09	5.54336e-09	63.2925	1.01094	-0.674245	0.592575	-0.0858879	0.0329178	-0.684137	0.601984	36.4673
148	4.39726e-10	2.18576e-09	3.95986e-09	5.22936e-09	63.3256	1.00812	-0.406633	0.338017	0.284818	-0.319705	-0.407095	0.338457	38.2195
149	4.39515e-10	2.19336e-09	3.95987e-09	5.24778e-09	63.3236	1.00828	-0.405105	0.336564	0.27428	-0.309681	-0.406233	0.337636	37.7847
150	4.39539e-10	2.19252e-09	3.95987e-09	5.24573e-09	63.3238	1.00826	-0.405177	0.336632	0.2755	-0.310841	-0.406233	0.337636	37.8306
151	4.39515e-10	2.19336e-09	3.95987e-09	5.24778e-09	63.3236	1.00828	-0.342394	0.276912	0.306696	-0.340515	-0.343007	0.277495	36.7156
152	4.39515e-10	2.19336e-09	3.95987e-09	5.24778e-09	63.3236	1.00828	-0.39924	0.330984	0.27614	-0.311451	-0.40272	0.334295	37.6553
153	4.39515e-10	2.19336e-09	3.95987e-09	5.24778e-09	63.3236	1.00828	-0.405139	0.336595	0.274626	-0.31001	-0.406245	0.337648	37.7833
154	4.39515e-10	2.19336e-09	3.95987e-09	5.24778e-09	63.3236	1.00828	-0.403999	0.335512	0.274875	-0.310247	-0.402657	0.334235	37.7373
155	4.39955e-10	2.19336e-09	3.95987e-09	5.24778e-09	63.3236	1.00828	-0.342945	0.277435	0.306415	-0.340249	-0.343528	0.27799	36.7038
156	4.39515e-10	2.19556e-09	3.95987e-09	5.24778e-09	63.3236	1.00828	-0.399753	0.331472	0.276235	-0.311541	-0.402526	0.33411	37.6721
157	4.39515e-10	2.19336e-09	3.96383e-09	5.24778e-09	63.3236	1.00828	-0.405116	0.336574	0.274275	-0.309676	-0.406229	0.337633	37.785
158	4.39515e-10	2.19336e-09	3.95987e-09	5.25302e-09	63.3236	1.00828	-0.403933	0.335448	0.274911	-0.310281	-0.403257	0.334806	37.7442
159	4.39515e-10	2.19336e-09	3.95987e-09	5.24778e-09	63.387	1.00828	-0.406543	0.337931	0.27354	-0.308977	-0.407619	0.338954	37.7857
160	4.39515e-10	2.19336e-09	3.95987e-09	5.24778e-09	63.3236	1.00929	-0.40507	0.33653	0.274299	-0.309699	-0.406181	0.337586	37.7827
161	4.36334e-10	2.36685e-09	3.96378e-09	5.70252e-09	63.4883	1.00938	-0.603941	0.5257	-0.175046	0.117727	-0.596921	0.519022	33.6189
162	4.38879e-10	2.22806e-09	3.96065e-09	5.33873e-09	63.3566	1.0085	-0.371988	0.305062	0.235717	-0.272999	-0.370802	0.303934	35.4484
163	4.38607e-10	2.24292e-09	3.96099e-09	5.37767e-09	63.3707	1.0086	-0.368851	0.302078	0.213234	-0.251612	-0.36703	0.300346	34.714
164	4.38618e-10	2.24229e-09	3.96097e-09	5.37602e-09	63.3701	1.00859	-0.368854	0.302081	0.214265	-0.252593	-0.367057	0.300371	34.7417
165	4.38607e-10	2.24292e-09	3.96099e-09	5.37767e-09	63.3707	1.0086	-0.303009	0.239448	0.250829	-0.287374	-0.301915	0.238407	33.5881
166	4.38607e-10	2.24292e-09	3.96099e-09	5.37767e-09	63.3707	1.0086	-0.363663	0.297143	0.21505	-0.253341	-0.363945	0.297411	34.6025
167	4.38607e-10	2.24292e-09	3.96099e-09	5.37767e-09	63.3707	1.0086	-0.368848	0.302075	0.213659	-0.252017	-0.366943	0.300263	34.6991
168	4.38607e-10	2.24292e-09	3.96099e-09	5.37767e-09	63.3707	1.0086	-0.367869	0.301144	0.213821	-0.252171	-0.363862	0.297333	34.6727
169	4.39045e-10	2.24292e-09	3.96099e-09	5.37767e-09	63.3707	1.0086	-0.303793	0.240193	0.250461	-0.287024	-0.302484	0.238948	33.6148
170	4.38607e-10	2.24516e-09	3.96099e-09	5.37767e-09	63.3707	1.0086	-0.364176	0.297631	0.215151	-0.253437	-0.363764	0.297239	34.6155
171	4.38607e-10	2.24292e-09	3.96495e-09	5.37767e-09	63.3707	1.0086	-0.368848	0.302075	0.213242	-0.25162	-0.367008	0.300324	34.7111
172	4.38607e-10	2.24292e-09	3.96099e-09	5.38305e-09	63.3707	1.0086	-0.367803	0.301081	0.213856	-0.252205	-0.364473	0.297914	34.6797
173	4.38607e-10	2.24292e-09	3.96099e-09	5.37767e-09	63.4341	1.0086	-0.37022	0.30338	0.212447	-0.250864	-0.368398	0.301647	34.7141
174	4.38607e-10	2.24292e-09	3.96099e-09	5.37767e-09	63.3707	1.00961	-0.368807	0.302035	0.213201	-0.251581	-0.367136	0.300446	34.7071
175	4.31325e-10	2.55231e-09	3.95903e-09	6.1083e-09	63.3874	1.01497	-1.10224	0.999691	-0.934924	0.840537	-1.10085	0.998368	34.456
176	4.3715e-10	2.30479e-09	3.96059e-09	5.5238e-09	63.374	1.00987	-0.332012	0.267036	0.146993	-0.188603	-0.331012	0.266084	31.7599
177	4.37294e-10	2.2987e-09	3.96063e-09	5.5094e-09	63.3737	1.00975	-0.331896	0.266925	0.155704	-0.196889	-0.330892	0.265971	31.9613
178	4.37242e-10	2.3009e-09	3.96062e-09	5.5146e-09	63.3738	1.00979	-0.331539	0.266586	0.152606	-0.193942	-0.330791	0.265875	31.8505
179	4.37242e-10	2.3009e-09	3.96062e-09	5.5146e-09	63.3738	1.00979	-0.263994	0.202336	0.19609	-0.235305	-0.262674	0.20108	30.7818
180	4.37242e-10	2.3009e-09	3.96062e-09	5.5146e-09	63.3738	1.00979	-0.327329	0.262581	0.154386	-0.195635	-0.328146	0.263358	31.8011
181	4.37242e-10	2.3009e-09	3.96062e-09	5.5146e-09	63.3738	1.00979	-0.3316	0.266644	0.153011	-0.194328	-0.330825	0.265907	31.8521
182	4.37242e-10	2.3009e-09	3.96062e-09	5.5146e-09	63.3738	1.00979	-0.330999	0.266072	0.153194	-0.194501	-0.328018	0.263237	31.8563
183	4.37679e-10	2.3009e-09	3.96062e-09	5.5146e-09	63.3738	1.00979	-0.264485	0.202803	0.195686	-0.234921	-0.263066	0.201453	30.7744
184	4.37242e-10	2.3032e-09	3.96062e-09	5.5146e-09	63.3738	1.00979	-0.327914	0.263138	0.15455	-0.195791	-0.327929	0.263152	31.8042
185	4.37242e-10	2.3009e-09	3.96458e-09	5.5146e-09	63.3738	1.00979	-0.331828	0.26686	0.152618	-0.193953	-0.330839	0.26592	31.8846
186	4.37242e-10	2.3009e-09	3.96062e-09	5.52012e-09	63.3738	1.00979	-0.330953	0.266029	0.153235	-0.194541	-0.328614	0.263804	31.864
187	4.37242e-10	2.3009e-09	3.96062e-09	5.5146e-09	63.4372	1.00979	-0.333195	0.268161	0.151787	-0.193164	-0.332158	0.267175	31.8906
188	4.37242e-10	2.3009e-09	3.96062e-09	5.5146e-09	63.3738	1.0108	-0.331501	0.26655	0.152635	-0.19397	-0.330747	0.265832	31.8493
189	4.43953e-10	2.44385e-09	3.76883e-09	5.84039e-09	59.5163	1.00838	-0.364174	0.297629	-0.310965	0.247016	-0.428575	0.358888	29.1445
190	4.38584e-10	2.32949e-09	3.92226e-09	5.57976e-09	62.6023	1.00951	-0.279115	0.216719	0.113192	-0.156451	-0.294216	0.231084	30.0785
191	4.39679e-10	2.35282e-09	3.89097e-09	5.63291e-09	61.9729	1.00928	-0.259516	0.198076	0.0652597	-0.110857	-0.285538	0.222829	29.1234
192	4.39627e-10	2.3517e-09	3.89247e-09	5.63037e-09	62.003	1.00929	-0.260028	0.198563	0.067892	-0.113361	-0.285531	0.222822	29.1588
193	4.39627e-10	2.3517e-09	3.89247e-09	5.63037e-09	62.003	1.00929	-0.191599	0.133472	0.118889	-0.16187	-0.215582	0.156285	28.1004
194	4.39627e-10	2.3517e-09	3.89247e-09	5.63037e-09	62.003	1.00929	-0.256187	0.19491	0.0695544	-0.114942	-0.283311	0.22071	29.0873
195	4.39627e-10	2.3517e-09	3.89247e-09	5.63037e-09	62.003	1.00929	-0.260119	0.19865	0.0683214	-0.113769	-0.285515	0.222807	29.1559
196	4.39627e-10	2.3517e-09	3.89247e-09	5.63037e-09	62.003	1.00929	-0.259297	0.197868	0.0684512	-0.113893	-0.283029	0.220442	29.1307
197	4.40066e-10	2.3517e-09	3.89247e-09	5.63037e-09	62.003	1.00929	-0.192082	0.133932	0.118505	-0.161505	-0.216091	0.15677	28.0954
198	4.39627e-10	2.35405e-09	3.89247e-09	5.63037e-09	62.003	1.00929	-0.256762	0.195457	0.0696192	-0.115004	-0.283169	0.220576	29.1004
199	4.39627e-10	2.3517e-09	3.89636e-09	5.63037e-09	62.003	1.00929	-0.259996	0.198533	0.0678979	-0.113366	-0.285549	0.222839	29.1587
200	4.39627e-10	2.3517e-09	3.89247e-09	5.636e-09	62.003	1.00929	-0.259284	0.197856	0.068478	-0.113918	-0.283597	0.220983	29.1362
201	4.39627e-10	2.3517e-09	3.89247e-09	5.63037e-09	62.065	1.00929	-0.261226	0.199703	0.0669767	-0.11249	-0.286845	0.224072	29.1586
202	4.39627e-10	2.3517e-09	3.89247e-09	5.63037e-09	62.003	1.0103	-0.260007	0.198543	0.0679207	-0.113388	-0.285468	0.222762	29.1566
203	4.38977e-10	2.50083e-09	3.89165e-09	6.04563e-09	61.8534	1.00974	-0.169474	0.112427	-0.125532	0.0706285	-0.156213	0.0998119	25.2303
204	4.37927e-10	2.74214e-09	3.89033e-09	6.71753e-09	61.6112	1.01046	-0.438548	0.368375	-1.18973	1.08292	-0.384487	0.316952	29.5507
205	4.3917e-10	2.45661e-09	3.89189e-09	5.9225e-09	61.8977	1.0096	-0.1725	0.115305	-0.0443948	-0.00655133	-0.167944	0.110972	25.7915
206	4.39056e-10	2.48283e-09	3.89175e-09	5.9955e-09	61.8714	1.00968	-0.16861	0.111605	-0.0898002	0.0366392	-0.158745	0.102221	25.4066
207	4.39056e-10	2.48283e-09	3.89175e-09	5.9955e-09	61.8714	1.00968	-0.0999529	0.0462966	-0.0259698	-0.0240775	-0.0909265	0.0377106	24.3801
208	4.39056e-10	2.48283e-09	3.89175e-09	5.9955e-09	61.8714	1.00968	-0.165696	0.108833	-0.0882849	0.0351978	-0.157165	0.100718	25.3552
209	4.39056e-10	2.48283e-09	3.89175e-09	5.9955e-09	61.8714	1.00968	-0.168577	0.111573	-0.0891457	0.0360167	-0.158607	0.10209	25.4031
210	4.39056e-10	2.48283e-09	3.89175e-09	5.9955e-09	61.8714	1.00968	-0.168106	0.111125	-0.0893188	0.0361813	-0.156908	0.100474	25.3878
211	4.39495e-10	2.48283e-09	3.89175e-09	5.9955e-09	61.8714	1.00968	-0.100407	0.0467285	-0.0263961	-0.023672	-0.0913796	0.0381416	24.3756
212	4.39056e-10	2.48531e-09	3.89175e-09	5.9955e-09	61.8714	1.00968	-0.1662	0.109312	-0.088213	0.0351295	-0.157089	0.100645	25.3665
213	4.39056e-10	2.48283e-09	3.89564e-09	5.9955e-09	61.8714	1.00968	-0.168614	0.111608	-0.089811	0.0366495	-0.158754	0.10223	25.4066
214	4.39056e-10	2.48283e-09	3.89175e-09	6.0015e-09	61.8714	1.00968	-0.16807	0.111091	-0.0892748	0.0361394	-0.157434	0.100974	25.3924
215	4.39056e-10	2.48283e-09	3.89175e-09	5.9955e-09	61.9333	1.00968	-0.169716	0.112656	-0.0907431	0.0375362	-0.159735	0.103163	25.4069
216	4.39056e-10	2.48283e-09	3.89175e-09	5.9955e-09	61.8714	1.01069	-0.168561	0.111558	-0.0897459	0.0365876	-0.158686	0.102165	25.4047
217	4.39416e-10	2.48289e-09	3.89175e-09	5.99553e-09	61.8706	1.00968	-0.0558251	0.00432143	0.0154005	-0.0634298	-0.0468739	-0.00419316	23.7104
218	4.39998e-10	2.48299e-09	3.89175e-09	5.99558e-09	61.8691	1.00968	0.0903935	-0.134765	0.151461	-0.192853	0.0977671	-0.141778	21.3586
219	4.39487e-10	2.4829e-09	3.89175e-09	5.99554e-09	61.8704	1.00968	-0.0355257	-0.0149878	0.0340259	-0.0811466	-0.0271114	-0.0229916	23.415
220	4.39416e-10	2.48289e-09	3.89175e-09	5.99553e-09	61.8706	1.00968	0.00174425	-0.0504397	0.0691212	-0.11453	0.0102497	-0.0585302	22.8127
221	4.39416e-10	2.48289e-09	3.89175e-09	5.99553e-09	61.8706	1.00968	-0.0532852	0.0019054	0.0166765	-0.0646435	-0.0455459	-0.00545633	23.6636
222	4.39416e-10	2.48289e-09	3.89175e-09	5.99553e-09	61.8706	1.00968	-0.0558614	0.00435593	0.0158341	-0.0638422	-0.0469308	-0.00413897	23.7093
223	4.39416e-10	2.48289e-09	3.89175e-09	5.99553e-09	61.8706	1.00968	-0.055396	0.00391325	0.01581	-0.0638193	-0.0452417	-0.00574573	23.6932
224	4.39855e-10	2.48289e-09	3.89175e-09	5.99553e-09	61.8706	1.00968	0.00131135	-0.0500279	0.0687142	-0.114143	0.00981647	-0.0581181	22.8091
225	4.39416e-10	2.48537e-09	3.89175e-09	5.99553e-09	61.8706	1.00968	-0.0537594	0.00235653	0.0167135	-0.0646787	-0.0455081	-0.00549227	23.676
226	4.39416e-10	2.48289e-09	3.89564e-09	5.99553e-09	61.8706	1.00968	-0.0558304	0.00432643	0.0153867	-0.0634166	-0.0468861	-0.00418148	23.7113
227	4.39416e-10	2.48289e-09	3.89175e-09	6.00153e-09	61.8706	1.00968	-0.0553722	0.0038906	0.0158327	-0.0638409	-0.0457358	-0.00527566	23.6974
228	4.39416e-10	2.48289e-09	3.89175e-09	5.99553e-09	61.9324	1.00968	-0.0568752	0.00532028	0.0144212	-0.0624982	-0.047915	-0.00320277	23.7101
229	4.39416e-10	2.48289e-09	3.89175e-09	5.99553e-09	61.8706	1.01069	-0.0557907	0.0042887	0.0154332	-0.0634608	-0.0468389	-0.00422639	23.7086
230	4.39321e-10	2.49686e-09	3.89216e-09	5.99498e-09	61.8694	1.00968	-0.051189	-8.84814e-05	-0.00200799	-0.0468704	-0.0561589	0.00463893	23.6127
231	4.39167e-10	2.51945e-09	3.89282e-09	5.99409e-09	61.8675	1.00966	-0.0461399	-0.00489134	-0.0331055	-0.0172899	-0.0732936	0.0209378	23.5295
232	4.39304e-10	2.49932e-09	3.89223e-09	5.99488e-09	61.8692	1.00967	-0.0504903	-0.000753157	-0.0052019	-0.0438323	-0.0578851	0.00628097	23.5982
233	4.39345e-10	2.49324e-09	3.89205e-09	5.99512e-09	61.8697	1.00968	-0.0523116	0.000979369	0.00253617	-0.0511929	-0.0537598	0.00235691	23.643
234	4.39345e-10	2.49324e-09	3.89205e-09	5.99512e-09	61.8697	1.00968	0.00558079	-0.054089	0.057086	-0.103082	0.00386654	-0.0524584	22.7512
235	4.39345e-10	2.49324e-09	3.89205e-09	5.99512e-09	61.8697	1.00968	-0.0497752	-0.00143335	0.00390052	-0.0524907	-0.0523452	0.00101125	23.5895
236	4.39345e-10	2.49324e-09	3.89205e-09	5.99512e-09	61.8697	1.00968	-0.0522976	0.000965982	0.00309813	-0.0517275	-0.053684	0.00228479	23.6315
237	4.39345e-10	2.49324e-09	3.89205e-09	5.99512e-09	61.8697	1.00968	-0.0518876	0.000576047	0.00294908	-0.0515857	-0.0521182	0.00079538	23.6257
238	4.39785e-10	2.49324e-09	3.89205e-09	5.99512e-09	61.8697	1.00968	0.00507219	-0.0536052	0.0566515	-0.102669	0.0034079	-0.0520221	22.7476
239	4.39345e-10	2.49573e-09	3.89205e-09	5.99512e-09	61.8697	1.00968	-0.0502425	-0.000988839	0.00395421	-0.0525418	-0.0522887	0.000957553	23.6001
240	4.39345e-10	2.49324e-09	3.89594e-09	5.99512e-09	61.8697	1.00968	-0.0523027	0.000970836	0.0025577	-0.0512134	-0.0537337	0.00233207	23.6409
241	4.39345e-10	2.49324e-09	3.89205e-09	6.00112e-09	61.8697	1.00968	-0.0518572	0.000547139	0.00297796	-0.0516132	-0.0526096	0.00126282	23.6298
242	4.39345e-10	2.49324e-09	3.89205e-09	5.99512e-09	61.9316	1.00968	-0.0533306	0.00194858	0.001629	-0.05033	-0.0547179	0.00326827	23.6353
243	4.39345e-10	2.49324e-09	3.89205e-09	5.99512e-09	61.8697	1.01069	-0.0522711	0.000940824	0.00259842	-0.0512522	-0.053694	0.00229433	23.6384
244	4.38647e-10	2.4871e-09	3.88992e-09	5.98728e-09	61.4504	1.00858	-0.0515816	0.000284976	0.00212283	-0.0507998	-0.0514849	0.000192989	23.8775
245	4.37518e-10	2.47716e-09	3.88646e-09	5.97459e-09	60.772	1.0068	-0.0513061	2.28864e-05	0.000561882	-0.049315	-0.0486502	-0.00250342	24.2779
246	4.34562e-10	2.45116e-09	3.87742e-09	5.94138e-09	58.9959	1.00215	-0.0559079	0.00440021	-0.00916336	-0.0400641	-0.0461485	-0.00488314	25.4585
247	4.34506e-10	2.45561e-09	3.87716e-09	5.92878e-09	58.9823	1.00205	-0.0507827	-0.000475032	-0.00963878	-0.0396119	-0.0519809	0.000664787	25.3942
248	4.26823e-10	2.38308e-09	3.85375e-09	5.85441e-09	54.3461	1	-0.108549	0.0544734	-0.0769377	0.0244041	-0.0769466	0.0244126	29.7103
249	4.26796e-10	2.39742e-09	3.85292e-09	5.81389e-09	54.3017	1	-0.0416321	-0.00917922	-0.0302063	-0.0200477	-0.0482607	-0.00287399	28.6309
250	4.26811e-10	2.39441e-09	3.8531e-09	5.8224e-09	54.311	1.00006	-0.0524307	0.00109265	-0.0370872	-0.0135024	-0.0513955	0.000107955	28.8023
251	4.06562e-10	2.20485e-09	3.79179e-09	5.62673e-09	42.1728	1	-0.52297	0.448679	-0.596167	0.518306	-0.374657	0.307601	51.1072
252	4.07181e-10	2.27183e-09	3.7879e-09	5.43783e-09	41.9634	1	0.053549	-0.0997174	-0.104778	0.0508861	-0.0541546	0.00273241	40.0245
253	4.07605e-10	2.22284e-09	3.79075e-09	5.57648e-09	42.1147	1.00106	-0.0927226	0.039419	-0.180179	0.122609	-0.0426102	-0.00824888	42.7508
254	4.07381e-10	2.24564e-09	3.78942e-09	5.51193e-09	42.0443	1.00056	-0.0246765	-0.0253077	-0.148583	0.092555	-0.0504532	-0.000788437	41.4424
255	4.07477e-10	2.23392e-09	3.79011e-09	5.5451e-09	42.0805	1.00082	-0.0637176	0.011829	-0.169823	0.112758	-0.0506541	-0.000597316	42.1889
256	4.07424e-10	2.23986e-09	3.78976e-09	5.52828e-09	42.0622	1.00069	-0.0444182	-0.00652905	-0.159991	0.103406	-0.0514399	0.000150143	41.8087
257	4.07452e-10	2.23667e-09	3.78995e-09	5.53732e-09	42.0721	1.00076	-0.0549924	0.00352935	-0.165381	0.108534	-0.0510374	-0.000232674	42.0184
258	4.07436e-10	2.23847e-09	3.78984e-09	5.53223e-09	42.0665	1.00072	-0.0491006	-0.00207508	-0.162556	0.105846	-0.0515004	0.000207709	41.9047
259	4.23349e-10	2.35252e-09	3.84313e-09	5.81537e-09	52.259	1	-0.15714	0.100694	-0.13425	0.0789204	-0.112873	0.0585862	32.3167
260	4.23406e-10	2.37256e-09	3.84197e-09	5.75878e-09	52.1966	1	-0.0272731	-0.0228378	-0.0333135	-0.0170921	-0.0397668	-0.0109535	30.0962
261	4.23412e-10	2.3669e-09	3.84229e-09	5.77479e-09	52.2142	1.00012	-0.0545665	0.00312419	-0.0528517	0.00149309	-0.0519549	0.000640033	30.5889
262	4.23404e-10	2.36809e-09	3.84223e-09	5.77143e-09	52.2105	1.0001	-0.0506768	-0.000575734	-0.0505614	-0.000685475	-0.0512212	-5.79187e-05	30.5299
263	4.23404e-10	2.36809e-09	3.84223e-09	5.77143e-09	52.2105	1.0001	0.00903833	-0.0573779	0.00883088	-0.0571806	0.00837621	-0.0567481	29.3766
264	4.23404e-10	2.36809e-09	3.84223e-09	5.77143e-09	52.2105	1.0001	-0.0477656	-0.00334492	-0.0490748	-0.00209955	-0.0493488	-0.00183894	30.4418
265	4.23404e-10	2.36809e-09	3.84223e-09	5.77143e-09	52.2105	1.0001	-0.0537869	0.00238265	-0.0531656	0.00179169	-0.0542872	0.00285856	30.5463
266	4.23404e-10	2.36809e-09	3.84223e-09	5.77143e-09	52.2105	1.0001	-0.0501298	-0.00109601	-0.0499853	-0.00123351	-0.0493503	-0.00183754	30.501
267	4.23827e-10	2.36809e-09	3.84223e-09	5.77143e-09	52.2105	1.0001	0.00859832	-0.0569594	0.00840241	-0.056773	0.00798578	-0.0563767	29.3729
268	4.23404e-10	2.37045e-09	3.84223e-09	5.77143e-09	52.2105	1.0001	-0.0519117	0.000598924	-0.0526742	0.00132425	-0.0529415	0.00157853	30.494
269	4.23404e-10	2.36809e-09	3.84607e-09	5.77143e-09	52.2105	1.0001	-0.0507247	-0.000530127	-0.0507633	-0.00049345	-0.0510266	-0.000242954	30.5113
270	4.23404e-10	2.36809e-09	3.84223e-09	5.7772e-09	52.2105	1.0001	-0.050331	-0.000904688	-0.0502021	-0.00102726	-0.0500558	-0.0011664	30.5226
271	4.23404e-10	2.36809e-09	3.84223e-09	5.77143e-09	52.2627	1.0001	-0.0546428	0.00319679	-0.0546687	0.00322148	-0.0548706	0.0034135	30.5092
272	4.23404e-10	2.36809e-09	3.84223e-09	5.77143e-09	52.2105	1.0011	-0.0506879	-0.000565215	-0.0507225	-0.000532266	-0.05099	-0.000277822	30.5091
273	4.18201e-10	2.26945e-09	3.78943e-09	5.78663e-09	47.1642	1.0001	-0.445526	0.375012	-0.49564	0.422682	-0.360568	0.294199	41.5889
274	4.19998e-10	2.25331e-09	3.74163e-09	5.6583e-09	46.0579	1	-0.664334	0.583147	-0.637015	0.55716	-0.652554	0.571942	45.9777
275	4.22363e-10	2.34836e-09	3.83167e-09	5.77447e-09	51.2013	1.0001	-0.296528	0.233283	-0.304514	0.240879	-0.281982	0.219447	35.5988
276	4.23323e-10	2.34522e-09	3.82342e-09	5.7527e-09	51.0035	1	0.0155844	-0.0636047	0.0175619	-0.0654857	0.0179736	-0.0658773	30.0917
277	4.2305e-10	2.34656e-09	3.82323e-09	5.75069e-09	51.0006	1	-0.0531101	0.00173886	-0.0534024	0.00201694	-0.0527314	0.00137869	31.4473
278	4.2305e-10	2.34656e-09	3.82323e-09	5.75069e-09	51.0006	1	0.00700484	-0.0554436	0.00662489	-0.0550822	0.00687596	-0.055321	30.267
279	4.2305e-10	2.34656e-09	3.82323e-09	5.75069e-09	51.0006	1	-0.0499323	-0.00128388	-0.0515491	0.000254009	-0.0509351	-0.000330043	31.3619
280	4.2305e-10	2.34656e-09	3.82323e-09	5.75069e-09	51.0006	1	-0.0528803	0.00152032	-0.0527628	0.00140854	-0.0529452	0.00158207	31.4131
281	4.2305e-10	2.34656e-09	3.82323e-09	5.75069e-09	51.0006	1	-0.0522897	0.000958479	-0.0526608	0.0013115	-0.0509728	-0.000294188	31.3927
282	4.23473e-10	2.34656e-09	3.82323e-09	5.75069e-09	51.0006	1	0.00654031	-0.0550018	0.00617394	-0.0546533	0.00650057	-0.054964	30.2617
283	4.2305e-10	2.34891e-09	3.82323e-09	5.75069e-09	51.0006	1	-0.0502546	-0.00097729	-0.0513842	9.71817e-05	-0.0509636	-0.000302905	31.3659
284	4.2305e-10	2.34656e-09	3.82705e-09	5.75069e-09	51.0006	1	-0.0531068	0.0017357	-0.0534071	0.00202138	-0.0527187	0.0013666	31.4458
285	4.2305e-10	2.34656e-09	3.82323e-09	5.75644e-09	51.0006	1	-0.0525129	0.00117084	-0.052787	0.00143157	-0.0512969	1.41216e-05	31.4261
286	4.2305e-10	2.34656e-09	3.82323e-09	5.75069e-09	51.0516	1	-0.0541612	0.00273867	-0.0544552	0.00301835	-0.0537785	0.00237467	31.4467
287	4.2305e-10	2.34656e-09	3.82323e-09	5.75069e-09	51.0006	1.001	-0.0527892	0.00143359	-0.0531817	0.00180699	-0.0528582	0.00149925	31.4152
288	4.23021e-10	2.34559e-09	3.82315e-09	5.75011e-09	50.9792	1	-0.0519259	0.000612459	-0.0526111	0.00126422	-0.0517737	0.000467663	31.4373
289	4.23044e-10	2.34637e-09	3.82321e-09	5.75057e-09	50.9963	1	-0.0529221	0.00156004	-0.0532772	0.00189786	-0.0524939	0.0011527	31.4498
290	4.23033e-10	2.34599e-09	3.82318e-09	5.75035e-09	50.9879	1	-0.0525682	0.00122344	-0.0530368	0.00166916	-0.0520684	0.000748011	31.4591
291	4.23041e-10	2.34625e-09	3.8232e-09	5.7505e-09	50.9937	1	-0.0528104	0.00145382	-0.0532019	0.00182623	-0.0523569	0.00102244	31.4521
292	4.23033e-10	2.34599e-09	3.82318e-09	5.75035e-09	50.9879	1	0.00748011	-0.0558957	0.00693604	-0.0553782	0.00747042	-0.0558865	30.2785
293	4.23033e-10	2.34599e-09	3.82318e-09	5.75035e-09	50.9879	1	-0.049465	-0.0017284	-0.0512199	-5.91522e-05	-0.0502805	-0.000952665	31.3857
294	4.23033e-10	2.34599e-09	3.82318e-09	5.75035e-09	50.9879	1	-0.0523412	0.00100747	-0.0523976	0.00106117	-0.0522764	0.000945875	31.4247
295	4.23033e-10	2.34599e-09	3.82318e-09	5.75035e-09	50.9879	1	-0.0520031	0.00068587	-0.0524589	0.0011194	-0.0501332	-0.0010928	31.4306
296	4.23456e-10	2.34599e-09	3.82318e-09	5.75035e-09	50.9879	1	0.00707908	-0.0555142	0.00653593	-0.0549976	0.00706062	-0.0554967	30.2736
297	4.23033e-10	2.34833e-09	3.82318e-09	5.75035e-09	50.9879	1	-0.0498887	-0.00132537	-0.0511241	-0.000150272	-0.0501764	-0.00105168	31.3973
298	4.23033e-10	2.34599e-09	3.827e-09	5.75035e-09	50.9879	1	-0.0525655	0.00122086	-0.0530416	0.00167376	-0.0520571	0.000737238	31.4577
299	4.23033e-10	2.34599e-09	3.82318e-09	5.7561e-09	50.9879	1	-0.0517095	0.000406568	-0.0522543	0.000924822	-0.0507869	-0.000470999	31.4092
300	4.23033e-10	2.34599e-09	3.82318e-09	5.75035e-09	51.0389	1	-0.0536185	0.00222251	-0.0540891	0.00267015	-0.053114	0.00174259	31.4584
301	4.23033e-10	2.34599e-09	3.82318e-09	5.75035e-09	50.9879	1.001	-0.0525173	0.00117504	-0.0529912	0.00162582	-0.0520036	0.000686333	31.4544
302	4.22631e-10	2.33636e-09	3.82204e-09	5.71775e-09	50.6678	1	-0.0410672	-0.00971657	-0.0462541	-0.00478272	-0.0383278	-0.0123224	31.7351
303	4.22612e-10	2.33635e-09	3.82204e-09	5.71774e-09	50.6678	1	-0.0462096	-0.00482499	-0.0514224	0.000133531	-0.0434495	-0.00745052	31.837
304	4.2198e-10	2.32077e-09	3.82019e-09	5.665e-09	50.1497	1	-0.0249824	-0.0250168	-0.0381248	-0.0125155	-0.0186218	-0.0310671	32.2492
305	4.21932e-10	2.32076e-09	3.82019e-09	5.66499e-09	50.1498	1	-0.0380559	-0.012581	-0.0513653	7.91717e-05	-0.0316133	-0.0187093	32.5193
306	4.20277e-10	2.27997e-09	3.81536e-09	5.5269e-09	48.7934	1	0.00328762	-0.0519077	-0.0337056	-0.016719	0.0191872	-0.0670317	34.0651
307	4.20212e-10	2.27996e-09	3.81536e-09	5.52689e-09	48.7936	1	-0.0126488	-0.0367487	-0.050793	-0.00046516	0.00316677	-0.0517928	34.3896
308	4.20393e-10	2.28277e-09	3.81569e-09	5.53638e-09	48.8864	1	0.00205334	-0.0507337	-0.0333727	-0.0170357	0.0172707	-0.0652087	33.8981
309	4.20328e-10	2.28276e-09	3.81569e-09	5.53637e-09	48.8866	1	-0.014531	-0.0349584	-0.0505696	-0.000677662	0.000913236	-0.0496492	34.2651
310	4.20328e-10	2.28276e-09	3.81569e-09	5.53637e-09	48.8866	1	0.0395164	-0.0863692	0.00523201	-0.0537573	0.0538436	-0.0999976	33.0876
311	4.20328e-10	2.28276e-09	3.81569e-09	5.53637e-09	48.8866	1	-0.0113042	-0.0380277	-0.0485552	-0.0025938	0.00280098	-0.0514448	34.183
312	4.20328e-10	2.28276e-09	3.81569e-09	5.53637e-09	48.8866	1	-0.0145185	-0.0349702	-0.050223	-0.00100744	0.000619202	-0.0493695	34.2522
313	4.20328e-10	2.28276e-09	3.81569e-09	5.53637e-09	48.8866	1	-0.0137382	-0.0357124	-0.0500462	-0.00117561	0.00268427	-0.0513338	34.2166
314	4.20748e-10	2.28276e-09	3.81569e-09	5.53637e-09	48.8866	1	0.0390005	-0.0858785	0.00487824	-0.0534208	0.0534439	-0.0996173	33.1039
315	4.20328e-10	2.28504e-09	3.81569e-09	5.53637e-09	48.8866	1	-0.0115824	-0.0377631	-0.0485719	-0.00257793	0.00271781	-0.0513657	34.1834
316	4.20328e-10	2.28276e-09	3.81951e-09	5.53637e-09	48.8866	1	-0.0143706	-0.0351108	-0.0506631	-0.000588763	0.000761334	-0.0495047	34.2502
317	4.20328e-10	2.28276e-09	3.81569e-09	5.5419e-09	48.8866	1	-0.0138445	-0.0356113	-0.0500065	-0.00121336	0.00216511	-0.05084	34.233
318	4.20328e-10	2.28276e-09	3.81569e-09	5.53637e-09	48.9355	1	-0.0153417	-0.0341872	-0.0517219	0.000418402	-0.000278807	-0.0485153	34.2476
319	4.20328e-10	2.28276e-09	3.81569e-09	5.53637e-09	48.8866	1.001	-0.0143974	-0.0350854	-0.0506316	-0.000618698	0.000718885	-0.0494643	34.2529
320	4.20798e-10	2.26529e-09	3.80186e-09	5.51517e-09	48.2019	1	-0.0282077	-0.0219488	-0.0549354	0.00347518	-0.00915939	-0.0400679	35.2406
321	4.20812e-10	2.26529e-09	3.80186e-09	5.51517e-09	48.2019	1	-0.0244843	-0.0254906	-0.0511071	-0.00016639	-0.0055013	-0.0435475	35.1593
322	4.21558e-10	2.23703e-09	3.77948e-09	5.48087e-09	47.0941	1	-0.0543232	0.00289278	-0.0649137	0.0129667	-0.0281336	-0.0220193	36.9692
323	4.21612e-10	2.23704e-09	3.77948e-09	5.48087e-09	47.0939	1	-0.0401987	-0.0105427	-0.0506473	-0.000603813	-0.0143596	-0.0351214	36.6625
324	4.23548e-10	2.16305e-09	3.72089e-09	5.39107e-09	44.1937	1	-0.150578	0.0944522	-0.109644	0.055515	-0.100803	0.0471055	42.5999
325	4.23779e-10	2.16309e-09	3.72088e-09	5.3911e-09	44.1929	1	-0.0880086	0.034935	-0.0491704	-0.00200868	-0.0406402	-0.0101228	41.1982
326	4.22079e-10	2.21767e-09	3.76414e-09	5.45736e-09	46.3349	1	-0.0755453	0.0230797	-0.0737868	0.021407	-0.0440205	-0.00690734	38.3047
327	4.22168e-10	2.21768e-09	3.76414e-09	5.45737e-09	46.3346	1	-0.0519264	0.0006129	-0.05033	-0.000905625	-0.0212793	-0.0285392	37.7933
328	4.22168e-10	2.21768e-09	3.76414e-09	5.45737e-09	46.3346	1	0.00338135	-0.0519969	0.00491187	-0.0534528	0.0324262	-0.0796249	36.5185
329	4.22168e-10	2.21768e-09	3.76414e-09	5.45737e-09	46.3346	1	-0.0480636	-0.00306143	-0.0482417	-0.002892	-0.0191533	-0.0305615	37.6817
330	4.22168e-10	2.21768e-09	3.76414e-09	5.45737e-09	46.3346	1	-0.0519595	0.000644383	-0.0499473	-0.00126961	-0.021352	-0.0284701	37.7943
331	4.22168e-10	2.21768e-09	3.76414e-09	5.45737e-09	46.3346	1	-0.0512734	-8.2289e-06	-0.0496909	-0.00151353	-0.01919	-0.0305266	37.762
332	4.2259e-10	2.21768e-09	3.76414e-09	5.45737e-09	46.3346	1	0.00294064	-0.0515777	0.00456985	-0.0531274	0.0321501	-0.0793623	36.5121
333	4.22168e-10	2.2199e-09	3.76414e-09	5.45737e-09	46.3346	1	-0.0486082	-0.00254343	-0.0479768	-0.00314405	-0.0190305	-0.0306783	37.7074
334	4.22168e-10	2.21768e-09	3.76791e-09	5.45737e-09	46.3346	1	-0.0517593	0.00045394	-0.0504882	-0.00075513	-0.0212775	-0.0285409	37.777
335	4.22168e-10	2.21768e-09	3.76414e-09	5.46283e-09	46.3346	1	-0.0510784	-0.000193744	-0.0497613	-0.00144659	-0.0196377	-0.0301007	37.7516
336	4.22168e-10	2.21768e-09	3.76414e-09	5.45737e-09	46.3809	1	-0.0529569	0.00159314	-0.0514172	0.000128597	-0.0223091	-0.0275596	37.7976
337	4.22168e-10	2.21768e-09	3.76414e-09	5.45737e-09	46.3346	1.001	-0.0517171	0.00041385	-0.0504324	-0.000808174	-0.0212329	-0.0285833	37.775
338	3.88666e-10	2.00994e-09	3.22951e-09	4.24469e-09	28.669	1	0.363331	-0.394388	0.622834	-0.641233	0.260373	-0.296453	60.0758
339	3.87014e-10	2.00944e-09	3.22947e-09	4.24439e-09	28.6749	1	0.483797	-0.508977	0.694533	-0.709434	0.400878	-0.430104	52.4825
340	4.20479e-10	2.20721e-09	3.73719e-09	5.39625e-09	45.4441	1	-0.0476184	-0.0034849	-0.0263261	-0.0237386	-0.0194228	-0.0303051	38.7153
341	4.20465e-10	2.20721e-09	3.73719e-09	5.39625e-09	45.4442	1	-0.0513573	7.15822e-05	-0.0300885	-0.0201597	-0.0232526	-0.0266622	38.8176
342	4.1821e-10	2.19314e-09	3.70099e-09	5.31412e-09	44.2477	1	-0.0493725	-0.00181645	-0.00159699	-0.0472614	-0.0250138	-0.0249869	40.2445
343	4.18087e-10	2.19238e-09	3.69902e-09	5.30966e-09	44.1828	1	-0.0497112	-0.00149426	-0.00048751	-0.0483168	-0.0256113	-0.0244186	40.3365
344	4.18087e-10	2.19238e-09	3.69902e-09	5.30966e-09	44.1828	1	0.004396	-0.0529621	0.05089	-0.097188	0.026904	-0.0743721	39.0482
345	4.18087e-10	2.19238e-09	3.69902e-09	5.30966e-09	44.1828	1	-0.0458821	-0.00513652	0.00192087	-0.0506077	-0.0233462	-0.0265731	40.243
346	4.18087e-10	2.19238e-09	3.69902e-09	5.30966e-09	44.1828	1	-0.0496511	-0.00155142	-0.000157424	-0.0486307	-0.0259207	-0.0241242	40.3134
347	4.18087e-10	2.19238e-09	3.69902e-09	5.30966e-09	44.1828	1	-0.0490293	-0.0021429	0.00021952	-0.0489893	-0.0233256	-0.0265928	40.2999
348	4.18505e-10	2.19238e-09	3.69902e-09	5.30966e-09	44.1828	1	0.00398909	-0.052575	0.0505125	-0.096829	0.026513	-0.0740002	39.043
349	4.18087e-10	2.19457e-09	3.69902e-09	5.30966e-09	44.1828	1	-0.0461921	-0.00484169	0.00195692	-0.0506419	-0.0231409	-0.0267684	40.2416
350	4.18087e-10	2.19238e-09	3.70272e-09	5.30966e-09	44.1828	1	-0.0497109	-0.00149448	-0.000496328	-0.0483084	-0.0256165	-0.0244135	40.3362
351	4.18087e-10	2.19238e-09	3.69902e-09	5.31497e-09	44.1828	1	-0.0488104	-0.00235107	0.000175428	-0.0489474	-0.0240444	-0.0259089	40.284
352	4.18087e-10	2.19238e-09	3.69902e-09	5.30966e-09	44.227	1	-0.0507647	-0.000492098	-0.00148451	-0.0473684	-0.0266309	-0.0234486	40.337
353	4.18087e-10	2.19238e-09	3.69902e-09	5.30966e-09	44.1828	1.001	-0.049541	-0.00165616	-0.000524772	-0.0482813	-0.0258113	-0.0242283	40.3153
354	4.10965e-10	2.13412e-09	3.6967e-09	4.89696e-09	41.4377	1	0.0697364	-0.115115	-0.308035	0.244228	-0.0567815	0.0052312	50.07
355	4.10499e-10	2.13396e-09	3.6967e-09	4.89686e-09	41.4386	1	-0.0263743	-0.0236928	-0.442846	0.372463	-0.166107	0.109224	52.9429
356	4.10404e-10	2.13393e-09	3.6967e-09	4.89684e-09	41.4388	1	-0.046991	-0.00408168	-0.471989	0.400184	-0.189495	0.131471	53.5487
357	4.10387e-10	2.13392e-09	3.6967e-09	4.89684e-09	41.4389	1	-0.0502738	-0.000959048	-0.476655	0.404623	-0.193541	0.135319	53.6293
358	4.17327e-10	2.18616e-09	3.69877e-09	5.26564e-09	43.8899	1	-0.039725	-0.0109933	-0.021235	-0.0285813	-0.030183	-0.0200698	41.0173
359	4.17283e-10	2.18615e-09	3.69877e-09	5.26563e-09	43.89	1	-0.0515314	0.000237163	-0.0328182	-0.0175631	-0.0418678	-0.00895497	41.304
360	4.16934e-10	2.18295e-09	3.69864e-09	5.24285e-09	43.7384	1	-0.0347217	-0.0157526	-0.0329494	-0.0174384	-0.0327063	-0.0176696	41.4045
361	4.1687e-10	2.18293e-09	3.69864e-09	5.24284e-09	43.7385	1	-0.0517273	0.000423487	-0.0498453	-0.00136665	-0.049389	-0.0018007	41.8289
362	4.16901e-10	2.18268e-09	3.69863e-09	5.24095e-09	43.7258	1	-0.0343087	-0.0161454	-0.0339557	-0.0164811	-0.0329248	-0.0174618	41.4376
363	4.16836e-10	2.18266e-09	3.69863e-09	5.24094e-09	43.7259	1	-0.0517207	0.000417234	-0.0513075	2.42369e-05	-0.0500217	-0.00119889	41.873
364	4.16836e-10	2.18266e-09	3.69863e-09	5.24094e-09	43.7259	1	0.00187432	-0.0505634	0.00210977	-0.0507873	0.00353014	-0.0521384	40.5647
365	4.16836e-10	2.18266e-09	3.69863e-09	5.24094e-09	43.7259	1	-0.0478272	-0.0032863	-0.0490249	-0.002147	-0.0475581	-0.00354233	41.7641
366	4.16836e-10	2.18266e-09	3.69863e-09	5.24094e-09	43.7259	1	-0.0518163	0.000508226	-0.0509887	-0.000279056	-0.0499224	-0.00129329	41.8698
367	4.16836e-10	2.18266e-09	3.69863e-09	5.24094e-09	43.7259	1	-0.0510135	-0.000255459	-0.0506518	-0.000599537	-0.0474667	-0.00362926	41.8346
368	4.17253e-10	2.18266e-09	3.69863e-09	5.24094e-09	43.7259	1	0.00136649	-0.0500803	0.00169194	-0.0503899	0.00314611	-0.0517731	40.5913
369	4.16836e-10	2.18484e-09	3.69863e-09	5.24094e-09	43.7259	1	-0.0481894	-0.00294175	-0.0488681	-0.00229618	-0.0473982	-0.00369439	41.7781
370	4.16836e-10	2.18266e-09	3.70233e-09	5.24094e-09	43.7259	1	-0.0517234	0.000419809	-0.0513171	3.33652e-05	-0.0500225	-0.00119815	41.8731
371	4.16836e-10	2.18266e-09	3.69863e-09	5.24618e-09	43.7259	1	-0.0509494	-0.00031644	-0.0505849	-0.000663106	-0.0479244	-0.00319389	41.84
372	4.16836e-10	2.18266e-09	3.69863e-09	5.24094e-09	43.7696	1	-0.0527728	0.001418	-0.0523597	0.00102507	-0.051071	-0.000200766	41.873
373	4.16836e-10	2.18266e-09	3.69863e-09	5.24094e-09	43.7259	1.001	-0.0516924	0.000390312	-0.051355	6.93854e-05	-0.0498052	-0.00140481	41.8717
374	4.39307e-10	1.99199e-09	3.70191e-09	4.99199e-09	36.563	1.00259	-0.319038	0.254695	-0.146975	0.0910254	-0.0789837	0.0263504	66.049
375	4.38922e-10	2.04698e-09	3.70168e-09	4.79655e-09	36.5585	1	-0.0412562	-0.00953679	-0.0964053	0.0429221	-0.179929	0.122371	60.5336
376	4.39708e-10	2.01538e-09	3.70181e-09	4.90965e-09	36.5599	1.00298	-0.129749	0.0746394	-0.0677202	0.0156363	-0.0579917	0.00638237	61.3989
377	4.39587e-10	2.03182e-09	3.70174e-09	4.85123e-09	36.5586	1.00144	-0.0342815	-0.0161713	-0.034373	-0.0160842	-0.0676431	0.015563	59.2708
378	4.39719e-10	2.0242e-09	3.70177e-09	4.87842e-09	36.559	1.00216	-0.0653298	0.0133624	-0.0379165	-0.0127136	-0.0505952	-0.00065332	59.8408
379	4.39686e-10	2.02757e-09	3.70176e-09	4.86642e-09	36.5588	1.00184	-0.0471906	-0.0038919	-0.0322674	-0.0180871	-0.053779	0.00237517	59.4592
380	4.39709e-10	2.02607e-09	3.70177e-09	4.87179e-09	36.5589	1.00198	-0.0537221	0.002321	-0.0336441	-0.0167776	-0.0511494	-0.000126176	59.6211
381	4.75666e-10	1.68348e-09	3.7072e-09	4.58918e-09	24.9732	1.00678	0.787987	-0.798329	0.995048	-0.99529	0.962496	-0.964326	79.0629
382	4.71356e-10	1.72224e-09	3.70704e-09	4.44567e-09	24.9784	1.00301	0.756968	-0.768824	0.990095	-0.990578	0.933855	-0.937082	82.4316
383	4.67153e-10	1.76158e-09	3.70687e-09	4.30025e-09	24.9833	1	0.768445	-0.77974	0.983752	-0.984545	0.824074	-0.832656	61.2599
384	4.63628e-10	1.77329e-09	3.70682e-09	4.25373e-09	24.9895	1	0.793578	-0.803648	0.983525	-0.984329	0.783063	-0.793646	57.2401
385	4.60398e-10	1.7699e-09	3.70683e-09	4.26113e-09	24.9965	1.00021	0.803109	-0.812714	0.979071	-0.980092	0.806415	-0.815858	55.1384
386	4.42026e-10	1.96892e-09	3.7023e-09	4.96187e-09	35.6964	1.0029	-0.279271	0.216868	-0.0815667	0.0288074	-0.00591818	-0.043151	68.2287
387	4.41287e-10	2.03145e-09	3.70205e-09	4.73922e-09	35.6919	1	-0.0783288	0.0257274	-0.149831	0.0937413	-0.26208	0.200515	65.1115
388	4.42486e-10	1.98963e-09	3.70222e-09	4.88914e-09	35.6935	1.00395	-0.18938	0.131361	-0.0891421	0.0360132	-0.0623057	0.0104859	65.9426
389	4.42268e-10	2.01873e-09	3.7021e-09	4.78568e-09	35.6911	1.00122	-0.032256	-0.0180979	-0.0519535	0.000638717	-0.109519	0.0553958	62.6212
390	4.42654e-10	2.00111e-09	3.70217e-09	4.84868e-09	35.692	1.00288	-0.0952341	0.041808	-0.0465844	-0.00446849	-0.0508362	-0.000424123	63.5722
391	4.42561e-10	2.01128e-09	3.70213e-09	4.81252e-09	35.6912	1.00193	-0.0399796	-0.0107511	-0.0313039	-0.0190036	-0.0647845	0.0128438	62.3821
392	4.42664e-10	2.00561e-09	3.70215e-09	4.83274e-09	35.6916	1.00246	-0.0633932	0.0115203	-0.0330992	-0.0172959	-0.0498233	-0.00138762	62.8076
393	4.42631e-10	2.00872e-09	3.70214e-09	4.82169e-09	35.6913	1.00217	-0.0471353	-0.00394442	-0.0287288	-0.0214531	-0.0546316	0.00318611	62.4546
394	4.42659e-10	2.00701e-09	3.70215e-09	4.8278e-09	35.6914	1.00233	-0.0545532	0.00311154	-0.0298094	-0.0204252	-0.0506155	-0.000634076	62.5938
395	4.42649e-10	2.00791e-09	3.70214e-09	4.82459e-09	35.6914	1.00225	-0.0502216	-0.0010087	-0.028745	-0.0214377	-0.0519952	0.000678356	62.4993
396	4.58861e-10	1.82607e-09	3.70475e-09	4.77536e-09	30.3301	1.00484	0.478189	-0.503644	0.694593	-0.70949	0.735176	-0.748095	61.8604
397	4.55268e-10	1.88398e-09	3.70451e-09	4.565e-09	30.3319	1	0.479948	-0.505316	0.594139	-0.613937	0.510342	-0.534228	57.6658
398	4.53016e-10	1.89028e-09	3.70449e-09	4.53947e-09	30.336	1	0.56107	-0.582481	0.651366	-0.668372	0.555271	-0.576965	51.857
399	4.42649e-10	2.00791e-09	3.70214e-09	4.82459e-09	35.6914	1.00225	-0.0199324	-0.0298204	0.000686032	-0.0494331	-0.0220367	-0.0278188	61.5162
400	4.42649e-10	2.00791e-09	3.70214e-09	4.82459e-09	35.6914	1.00225	-0.0459752	-0.00504795	-0.0266379	-0.023442	-0.0502799	-0.000953241	62.3476
401	4.42649e-10	2.00791e-09	3.70214e-09	4.82459e-09	35.6914	1.00225	-0.0501881	-0.00104062	-0.0283209	-0.0218411	-0.0522522	0.000922849	62.498
402	4.42649e-10	2.00791e-09	3.70214e-09	4.82459e-09	35.6914	1.00225	-0.0496123	-0.00158834	-0.0280299	-0.0221179	-0.0492528	-0.00193031	62.4436
403	4.43091e-10	2.00791e-09	3.70214e-09	4.82459e-09	35.6914	1.00225	-0.0203628	-0.029411	0.000279693	-0.0490465	-0.0224074	-0.0274661	61.5162
404	4.42649e-10	2.00991e-09	3.70214e-09	4.82459e-09	35.6914	1.00225	-0.0461444	-0.004887	-0.0263014	-0.0237621	-0.0499332	-0.0012831	62.3588
405	4.42649e-10	2.00791e-09	3.70585e-09	4.82459e-09	35.6914	1.00225	-0.0502619	-0.000970376	-0.0288426	-0.0213448	-0.0518757	0.000564703	62.4955
406	4.42649e-10	2.00791e-09	3.70214e-09	4.82941e-09	35.6914	1.00225	-0.0496136	-0.00158709	-0.0280884	-0.0220623	-0.0495162	-0.00167973	62.4479
407	4.42649e-10	2.00791e-09	3.70214e-09	4.82459e-09	35.7271	1.00225	-0.0513138	3.02423e-05	-0.0298592	-0.0203778	-0.052926	0.00156373	62.4951
408	4.42649e-10	2.00791e-09	3.70214e-09	4.82459e-09	35.6914	1.00325	-0.0502075	-0.00102216	-0.0287785	-0.0214058	-0.0518065	0.000498913	62.4907
409	4.42096e-10	1.99652e-09	3.69639e-09	4.78272e-09	35.032	1	-0.0439414	-0.00698254	-0.0048713	-0.0441468	-0.0568005	0.00524921	64.3765
410	4.42116e-10	1.99439e-09	3.6967e-09	4.78769e-09	35.0357	1.00008	-0.0498934	-0.00132096	-0.00836409	-0.0408244	-0.0517642	0.000458617	64.6149
411	4.41203e-10	1.9781e-09	3.68709e-09	4.71497e-09	33.9652	1	-0.0327514	-0.0176267	0.0364207	-0.0834245	-0.0651224	0.0131652	67.6956
412	4.41253e-10	1.97274e-09	3.68786e-09	4.72749e-09	33.9743	1.0002	-0.0463169	-0.00472297	0.0300845	-0.0773974	-0.0490889	-0.00208615	68.2051
413	4.41235e-10	1.97227e-09	3.68793e-09	4.72852e-09	33.9752	1.00022	-0.0496645	-0.00153862	0.0277976	-0.0752221	-0.0497174	-0.00148836	68.3137
414	4.41881e-10	1.99207e-09	3.69415e-09	4.76637e-09	34.7746	1	-0.0419313	-0.00889463	0.00458066	-0.0531377	-0.058685	0.00704183	65.1892
415	4.41908e-10	1.9893e-09	3.69455e-09	4.77285e-09	34.7794	1.0001	-0.049174	-0.0020052	0.00048805	-0.0492447	-0.0517569	0.000451709	65.4574
416	4.41893e-10	1.99232e-09	3.69427e-09	4.76727e-09	34.7887	1	-0.0417677	-0.0090502	0.00404542	-0.0526286	-0.0588071	0.00715795	65.1244
417	4.4192e-10	1.9895e-09	3.69468e-09	4.77386e-09	34.7935	1.0001	-0.0494592	-0.00173391	-0.000100537	-0.0486849	-0.0515097	0.000216591	65.419
418	4.41908e-10	1.9893e-09	3.69455e-09	4.77285e-09	34.7794	1.0001	-0.0238813	-0.0260642	0.0246856	-0.0722619	-0.026256	-0.0238052	64.6871
419	4.41908e-10	1.9893e-09	3.69455e-09	4.77285e-09	34.7794	1.0001	-0.0453745	-0.00561935	0.00183519	-0.0505262	-0.0505052	-0.000738929	65.2978
420	4.41908e-10	1.9893e-09	3.69455e-09	4.77285e-09	34.7794	1.0001	-0.049322	-0.00186448	0.00071387	-0.0494595	-0.0518777	0.000566595	65.4559
421	4.41908e-10	1.9893e-09	3.69455e-09	4.77285e-09	34.7794	1.0001	-0.0488644	-0.00229973	0.000784158	-0.0495264	-0.0490193	-0.00215235	65.4008
422	4.4235e-10	1.9893e-09	3.69455e-09	4.77285e-09	34.7794	1.0001	-0.0242734	-0.0256911	0.0245692	-0.0721512	-0.0266885	-0.0233939	64.6376
423	4.41908e-10	1.99129e-09	3.69455e-09	4.77285e-09	34.7794	1.0001	-0.0454794	-0.00551961	0.00219701	-0.0508703	-0.0501371	-0.0010891	65.3076
424	4.41908e-10	1.9893e-09	3.69824e-09	4.77285e-09	34.7794	1.0001	-0.049177	-0.0020024	0.000478539	-0.0492357	-0.0517483	0.000443485	65.4576
425	4.41908e-10	1.9893e-09	3.69455e-09	4.77763e-09	34.7794	1.0001	-0.0487973	-0.00236358	0.00100617	-0.0497376	-0.0492358	-0.00194643	65.4043
426	4.41908e-10	1.9893e-09	3.69455e-09	4.77285e-09	34.8142	1.0001	-0.0502905	-0.000943159	-0.000208519	-0.0485821	-0.0527679	0.0014134	65.4617
427	4.41908e-10	1.9893e-09	3.69455e-09	4.77285e-09	34.7794	1.0011	-0.0491285	-0.00204852	0.000552804	-0.0493063	-0.0516807	0.000379175	65.4532
428	4.21952e-10	1.84091e-09	3.69534e-09	4.41744e-09	31.6527	1.0001	0.299936	-0.334086	0.592229	-0.61212	0.304344	-0.338278	73.334
429	4.1604e-10	1.875e-09	3.69631e-09	4.51143e-09	31.3431	1	0.332964	-0.365502	0.895692	-0.90078	0.354229	-0.38573	60.1149
430	4.39364e-10	1.97038e-09	3.69465e-09	4.72755e-09	34.3808	1.0001	-0.0489615	-0.00220734	0.00658486	-0.0550441	-0.051392	0.000104583	68.3356
431	4.39291e-10	1.9707e-09	3.69467e-09	4.73077e-09	34.3743	1.0001	-0.0507019	-0.000551827	0.000915224	-0.0496511	-0.0497653	-0.00144272	68.3728
432	4.34134e-10	1.9315e-09	3.69486e-09	4.63441e-09	33.5614	1.0001	-0.0186246	-0.0310644	0.0582379	-0.104177	-0.0193113	-0.0304112	73.7099
433	4.33545e-10	1.93498e-09	3.69496e-09	4.64506e-09	33.5282	1.00009	-0.021902	-0.0279469	0.0318235	-0.0790516	-0.0191886	-0.0305279	73.5779
434	4.3327e-10	1.93567e-09	3.69497e-09	4.64467e-09	33.5256	1.00008	-0.0224507	-0.0274249	0.0279531	-0.07537	-0.022243	-0.0276225	73.5791
435	4.33038e-10	1.93563e-09	3.69497e-09	4.64461e-09	33.5262	1.00008	-0.0205519	-0.0292311	0.0296248	-0.0769602	-0.0200558	-0.0297031	73.4998
436	4.32553e-10	1.91974e-09	3.69492e-09	4.60624e-09	33.3136	1.0001	0.00510397	-0.0536355	0.0921246	-0.136411	0.00467446	-0.0532269	74.8342
437	4.31639e-10	1.92468e-09	3.69507e-09	4.62093e-09	33.2671	1.00008	0.0054112	-0.0539277	0.0640512	-0.109707	0.0100564	-0.0583463	74.3989
438	4.31074e-10	1.92631e-09	3.69509e-09	4.62156e-09	33.2587	1.00007	0.0175781	-0.0655011	0.0684768	-0.113917	0.0181516	-0.0660466	73.8381
439	4.39291e-10	1.9707e-09	3.69467e-09	4.73077e-09	34.3743	1.0001	-0.0307479	-0.0195325	0.0199156	-0.0677246	-0.0297641	-0.0204683	67.769
440	4.39291e-10	1.9707e-09	3.69467e-09	4.73077e-09	34.3743	1.0001	-0.0472913	-0.00379606	0.00167413	-0.0503729	-0.0493953	-0.0017947	68.2117
441	4.39291e-10	1.9707e-09	3.69467e-09	4.73077e-09	34.3743	1.0001	-0.0508126	-0.000446565	0.00109834	-0.0498252	-0.0499382	-0.00127833	68.3722
442	4.39291e-10	1.9707e-09	3.69467e-09	4.73077e-09	34.3743	1.0001	-0.050688	-0.000565068	0.000979028	-0.0497118	-0.0471691	-0.00391232	68.3232
443	4.3973e-10	1.9707e-09	3.69467e-09	4.73077e-09	34.3743	1.0001	-0.0311106	-0.0191875	0.0195474	-0.0673744	-0.0301832	-0.0200697	67.7535
444	4.39291e-10	1.97267e-09	3.69467e-09	4.73077e-09	34.3743	1.0001	-0.0476816	-0.00342481	0.00200681	-0.0506894	-0.0487565	-0.00240235	68.2431
445	4.39291e-10	1.9707e-09	3.69837e-09	4.73077e-09	34.3743	1.0001	-0.0505596	-0.000687249	0.000911852	-0.0496479	-0.0499228	-0.00129297	68.3699
446	4.39291e-10	1.9707e-09	3.69467e-09	4.7355e-09	34.3743	1.0001	-0.0505078	-0.000736459	0.0011388	-0.0498637	-0.0475225	-0.00357613	68.3267
447	4.39291e-10	1.9707e-09	3.69467e-09	4.73077e-09	34.4087	1.0001	-0.0516628	0.000362212	-8.66174e-05	-0.0486981	-0.05094	-0.000325356	68.3718
448	4.39291e-10	1.9707e-09	3.69467e-09	4.73077e-09	34.3743	1.0011	-0.0506647	-0.000587209	0.000983869	-0.0497164	-0.0496472	-0.00155514	68.3675
449	4.38196e-10	1.95659e-09	3.69726e-09	4.67331e-09	33.9253	1.0001	-0.0347547	-0.0157212	0.00947722	-0.0577954	-0.0564721	0.00493687	71.34
450	4.38132e-10	1.95379e-09	3.69643e-09	4.68234e-09	33.9177	1.00016	-0.0456645	-0.00534351	0.00558034	-0.0540886	-0.0454529	-0.00554482	71.6637
451	4.38073e-10	1.95382e-09	3.69644e-09	4.68229e-09	33.9182	1.00015	-0.0481051	-0.003022	0.00255813	-0.0512138	-0.0485741	-0.00257587	71.7243
452	4.38046e-10	1.9537e-09	3.69642e-09	4.68235e-09	33.9183	1.00016	-0.049744	-0.00146307	0.00165355	-0.0503534	-0.0495501	-0.00164749	71.7839
453	4.36424e-10	1.93376e-09	3.70144e-09	4.58033e-09	33.1987	1.0001	0.0295244	-0.0768647	0.0807258	-0.125568	-0.0337528	-0.0166741	74.8872
454	4.35712e-10	1.92904e-09	3.69913e-09	4.61404e-09	33.1806	1.00025	0.0211966	-0.0689431	0.0833215	-0.128038	0.0255402	-0.0730748	74.4513
455	4.36965e-10	1.94073e-09	3.70016e-09	4.6087e-09	33.4204	1.0001	0.00524262	-0.0537674	0.0497463	-0.0961002	-0.0448982	-0.00607246	74.0245
456	4.3654e-10	1.93587e-09	3.6983e-09	4.63303e-09	33.405	1.00022	-0.00788073	-0.0412842	0.0462271	-0.0927526	-0.0050711	-0.0439568	74.1725
457	4.36053e-10	1.93676e-09	3.69844e-09	4.63303e-09	33.4099	1.00021	0.00138737	-0.0501002	0.0504468	-0.0967665	0.00105061	-0.0497799	73.7194
458	4.36997e-10	1.94115e-09	3.70009e-09	4.61039e-09	33.4336	1.0001	0.00386737	-0.0524592	0.0482218	-0.09465	-0.0454716	-0.00552706	73.9725
459	4.36586e-10	1.93632e-09	3.69825e-09	4.63424e-09	33.4184	1.00022	-0.00943934	-0.0398016	0.0442648	-0.0908861	-0.00676164	-0.0423487	74.13
460	4.36119e-10	1.93713e-09	3.69838e-09	4.63415e-09	33.4231	1.00021	-0.00136615	-0.047481	0.0481383	-0.0945706	-0.00153171	-0.0473235	73.7938
461	4.38046e-10	1.9537e-09	3.69642e-09	4.68235e-09	33.9183	1.00016	-0.0395347	-0.0111744	0.0114442	-0.0596664	-0.0392611	-0.0114345	71.4987
462	4.38046e-10	1.9537e-09	3.69642e-09	4.68235e-09	33.9183	1.00016	-0.0482609	-0.00287378	0.000797126	-0.0495387	-0.0505707	-0.000676676	71.7574
463	4.38046e-10	1.9537e-09	3.69642e-09	4.68235e-09	33.9183	1.00016	-0.049862	-0.00135082	0.00181747	-0.0505093	-0.0496651	-0.00153812	71.7836
464	4.38046e-10	1.9537e-09	3.69642e-09	4.68235e-09	33.9183	1.00016	-0.0502893	-0.000944336	0.00110361	-0.0498303	-0.0473983	-0.00369431	71.7685
465	4.38484e-10	1.9537e-09	3.69642e-09	4.68235e-09	33.9183	1.00016	-0.0399134	-0.0108141	0.0110849	-0.0593247	-0.0396389	-0.0110752	71.4888
466	4.38046e-10	1.95566e-09	3.69642e-09	4.68235e-09	33.9183	1.00016	-0.0480758	-0.00304988	0.00117926	-0.0499022	-0.0501944	-0.00103457	71.6993
467	4.38046e-10	1.9537e-09	3.70012e-09	4.68235e-09	33.9183	1.00016	-0.0497386	-0.00146815	0.00164024	-0.0503407	-0.0495446	-0.00165267	71.7841
468	4.38046e-10	1.9537e-09	3.69642e-09	4.68703e-09	33.9183	1.00016	-0.0500316	-0.00118943	0.00128733	-0.050005	-0.0477161	-0.003392	71.7526
469	4.38046e-10	1.9537e-09	3.69642e-09	4.68235e-09	33.9522	1.00016	-0.0507937	-0.000464513	0.000655167	-0.0494037	-0.0505996	-0.000649126	71.7839
470	4.38046e-10	1.9537e-09	3.69642e-09	4.68235e-09	33.9183	1.00116	-0.0496859	-0.00151831	0.00170905	-0.0504062	-0.0494917	-0.001703	71.7799
471	4.36628e-10	1.92111e-09	3.69685e-09	4.63926e-09	33.4387	1.00016	-0.0258892	-0.0241542	0.0220543	-0.0697589	-0.0293374	-0.0208742	73.3121
472	4.36163e-10	1.92026e-09	3.69685e-09	4.64034e-09	33.4459	1.00015	-0.0159464	-0.0336119	0.0339838	-0.0811065	-0.0156751	-0.0338701	72.8252
473	4.37763e-10	1.94718e-09	3.69651e-09	4.67373e-09	33.8223	1.00016	-0.0483175	-0.00281993	0.0021683	-0.050843	-0.0487941	-0.00236658	72.2207
474	4.37021e-10	1.93014e-09	3.69673e-09	4.6512e-09	33.5716	1.00016	-0.0364015	-0.0141547	0.0121361	-0.0603245	-0.0389943	-0.0116883	72.9952
475	4.36758e-10	1.92945e-09	3.69673e-09	4.65183e-09	33.5757	1.00015	-0.0362176	-0.0143296	0.0142915	-0.0623748	-0.036022	-0.0145156	72.9522
476	4.36927e-10	1.92798e-09	3.69676e-09	4.64835e-09	33.5398	1.00016	-0.0340979	-0.0163459	0.0141689	-0.0622582	-0.0369716	-0.0136123	73.0615
477	4.36622e-10	1.92722e-09	3.69676e-09	4.64907e-09	33.5445	1.00015	-0.0325759	-0.0177937	0.0183676	-0.0662521	-0.0319322	-0.018406	72.9636
478	4.37763e-10	1.94718e-09	3.69651e-09	4.67373e-09	33.8223	1.00016	-0.0399227	-0.0108052	0.0100623	-0.058352	-0.040663	-0.010101	71.9254
479	4.37763e-10	1.94718e-09	3.69651e-09	4.67373e-09	33.8223	1.00016	-0.0469964	-0.00407661	0.00115643	-0.0498805	-0.0499765	-0.0012419	72.1252
480	4.37763e-10	1.94718e-09	3.69651e-09	4.67373e-09	33.8223	1.00016	-0.0484255	-0.00271725	0.00233715	-0.0510036	-0.0489067	-0.00225951	72.2199
481	4.37763e-10	1.94718e-09	3.69651e-09	4.67373e-09	33.8223	1.00016	-0.0490443	-0.00212863	0.00165329	-0.0503531	-0.0464233	-0.0046217	72.1846
482	4.382e-10	1.94718e-09	3.69651e-09	4.67373e-09	33.8223	1.00016	-0.0402999	-0.0104464	0.00970312	-0.0580103	-0.041041	-0.0097415	71.9153
483	4.37763e-10	1.94913e-09	3.69651e-09	4.67373e-09	33.8223	1.00016	-0.0470591	-0.00401695	0.00158266	-0.0502859	-0.0495116	-0.00168409	72.1343
484	4.37763e-10	1.94718e-09	3.7002e-09	4.67373e-09	33.8223	1.00016	-0.0483118	-0.00282538	0.00215542	-0.0508308	-0.0487884	-0.00237201	72.2209
485	4.37763e-10	1.94718e-09	3.69651e-09	4.67841e-09	33.8223	1.00016	-0.0488651	-0.00229907	0.00182188	-0.0505135	-0.046759	-0.00430246	72.1884
486	4.37763e-10	1.94718e-09	3.69651e-09	4.67373e-09	33.8562	1.00016	-0.049366	-0.00182263	0.00117044	-0.0498938	-0.0498427	-0.00136912	72.2207
487	4.37763e-10	1.94718e-09	3.69651e-09	4.67373e-09	33.8223	1.00116	-0.0482594	-0.00287525	0.00222372	-0.0508957	-0.0487358	-0.00242201	72.2167
488	4.36908e-10	1.93536e-09	3.69681e-09	4.65073e-09	33.5491	1.00016	-0.0283624	-0.0218017	0.0261696	-0.0736735	-0.0232633	-0.026652	73.3386
489	4.36289e-10	1.93653e-09	3.69682e-09	4.64899e-09	33.5613	1.00014	-0.00955023	-0.0396961	0.0393063	-0.0861694	-0.0106755	-0.0386257	72.6175
490	4.37592e-10	1.94482e-09	3.69657e-09	4.66913e-09	33.7677	1.00016	-0.0471469	-0.00393339	0.00395014	-0.0525379	-0.046425	-0.00462014	72.5461
491	4.37488e-10	1.94487e-09	3.69657e-09	4.66866e-09	33.7697	1.00015	-0.0491136	-0.00206265	0.00208323	-0.0507621	-0.0494041	-0.00178631	72.6308
492	4.37174e-10	1.93905e-09	3.69671e-09	4.6579e-09	33.6343	1.00016	-0.0383627	-0.0122891	0.0147657	-0.0628259	-0.0346808	-0.0157915	73.1574
493	4.36821e-10	1.93976e-09	3.69672e-09	4.65646e-09	33.6413	1.00015	-0.0341356	-0.0163101	0.0159175	-0.0639215	-0.0350001	-0.0154877	72.9633
494	4.37253e-10	1.94013e-09	3.69669e-09	4.66002e-09	33.6595	1.00016	-0.0405655	-0.0101938	0.0119382	-0.0601363	-0.0378449	-0.0127817	73.0374
495	4.36965e-10	1.94065e-09	3.69669e-09	4.65891e-09	33.6652	1.00015	-0.0386047	-0.0120589	0.0115887	-0.0598039	-0.0392304	-0.0114638	72.946
496	4.36667e-10	1.94054e-09	3.69669e-09	4.6589e-09	33.6709	1.00014	-0.0322649	-0.0180895	0.0184483	-0.0663289	-0.0322863	-0.0180691	72.725
497	4.37488e-10	1.94487e-09	3.69657e-09	4.66866e-09	33.7697	1.00015	-0.0441867	-0.00674921	0.00670192	-0.0551555	-0.0444496	-0.00649919	72.4861
498	4.37488e-10	1.94487e-09	3.69657e-09	4.66866e-09	33.7697	1.00015	-0.0481782	-0.00295249	0.000568193	-0.049321	-0.0513776	9.08494e-05	72.4961
499	4.37488e-10	1.94487e-09	3.69657e-09	4.66866e-09	33.7697	1.00015	-0.0490726	-0.00210163	0.00239378	-0.0510575	-0.0495179	-0.00167808	72.5801
500	4.37488e-10	1.94487e-09	3.69657e-09	4.66866e-09	33.7697	1.00015	-0.0500649	-0.0011578	0.00124228	-0.0499622	-0.0473939	-0.0036985	72.6306
501	4.37926e-10	1.94487e-09	3.69657e-09	4.66866e-09	33.7697	1.00015	-0.0445651	-0.00638929	0.00634201	-0.0548131	-0.0448276	-0.00613965	72.4761
502	4.37488e-10	1.94682e-09	3.69657e-09	4.66866e-09	33.7697	1.00015	-0.0482338	-0.00289952	0.00100099	-0.0497326	-0.0509226	-0.000341886	72.5047
503	4.37488e-10	1.94487e-09	3.70026e-09	4.66866e-09	33.7697	1.00015	-0.0489791	-0.00219057	0.00220608	-0.050879	-0.0494123	-0.0017785	72.5842
504	4.37488e-10	1.94487e-09	3.69657e-09	4.67333e-09	33.7697	1.00015	-0.0498885	-0.00132559	0.0014107	-0.0501224	-0.0477131	-0.00339488	72.6332
505	4.37488e-10	1.94487e-09	3.69657e-09	4.66866e-09	33.8035	1.00015	-0.0499449	-0.00127189	0.00121047	-0.0499319	-0.0504393	-0.000801595	72.5614
506	4.37488e-10	1.94487e-09	3.69657e-09	4.66866e-09	33.7697	1.00115	-0.0488531	-0.00231047	0.00225035	-0.0509211	-0.0493267	-0.00185999	72.5595
507	4.37501e-10	1.94423e-09	3.69608e-09	4.66823e-09	33.7538	1.00015	-0.0469926	-0.00408021	0.00200049	-0.0506834	-0.0462212	-0.00481397	72.6325
508	4.37345e-10	1.94405e-09	3.69603e-09	4.66863e-09	33.7579	1.00013	0.00428248	-0.0528541	0.0515905	-0.0978544	0.00618933	-0.0546679	68.9556
509	4.375e-10	1.9443e-09	3.69613e-09	4.66827e-09	33.7556	1.00015	-0.0472081	-0.00387521	0.00202998	-0.0507114	-0.0465761	-0.00447639	72.6253
510	4.37352e-10	1.94413e-09	3.69609e-09	4.66866e-09	33.7595	1.00013	-0.0496623	-0.00154075	0.000186235	-0.0489576	-0.0476994	-0.00340787	72.7118
511	4.3749e-10	1.94477e-09	3.69649e-09	4.66859e-09	33.7672	1.00015	-0.0487895	-0.00237101	0.00209343	-0.0507718	-0.0489101	-0.00225622	72.6306
512	4.37352e-10	1.94413e-09	3.69609e-09	4.66866e-09	33.7595	1.00013	-0.0466674	-0.00438953	0.0031085	-0.0517374	-0.0448793	-0.00609047	72.6333
513	4.37352e-10	1.94413e-09	3.69609e-09	4.66866e-09	33.7595	1.00013	-0.0491721	-0.00200704	-0.00196287	-0.0469134	-0.0498802	-0.00133351	72.6582
514	4.37352e-10	1.94413e-09	3.69609e-09	4.66866e-09	33.7595	1.00013	-0.0497635	-0.00144446	0.000335629	-0.0490997	-0.047771	-0.00333978	72.7118
515	4.37352e-10	1.94413e-09	3.69609e-09	4.66866e-09	33.7595	1.00013	-0.0506348	-0.000615676	-0.000653676	-0.0481587	-0.0458641	-0.00515362	72.6905
516	4.37789e-10	1.94413e-09	3.69609e-09	4.66866e-09	33.7595	1.00013	-0.0470353	-0.00403961	0.00276381	-0.0514095	-0.0452603	-0.00572805	72.6193
517	4.37352e-10	1.94607e-09	3.69609e-09	4.66866e-09	33.7595	1.00013	-0.0492356	-0.00194665	-0.00153016	-0.047325	-0.0494221	-0.0017692	72.6669
518	4.37352e-10	1.94413e-09	3.69978e-09	4.66866e-09	33.7595	1.00013	-0.0496672	-0.00153604	0.000147071	-0.0489204	-0.0476673	-0.00343847	72.7131
519	4.37352e-10	1.94413e-09	3.69609e-09	4.67332e-09	33.7595	1.00013	-0.0504758	-0.000766913	-0.000523821	-0.0482822	-0.046152	-0.00487976	72.6955
520	4.37352e-10	1.94413e-09	3.69609e-09	4.66866e-09	33.7933	1.00013	-0.0507067	-0.000547267	-0.000802552	-0.0480171	-0.0487564	-0.00240243	72.7112
521	4.37352e-10	1.94413e-09	3.69609e-09	4.66866e-09	33.7595	1.00113	-0.0494921	-0.00170265	0.000428309	-0.0491879	-0.0477235	-0.00338493	72.6945
522	4.36843e-10	1.94281e-09	3.69629e-09	4.6622e-09	33.7192	1.00013	-0.0408847	-0.00989017	0.0083495	-0.0567227	-0.0436176	-0.00729056	72.7066
523	4.36319e-10	1.94254e-09	3.69631e-09	4.66463e-09	33.7493	1.00004	-0.0219386	-0.0279121	0.0276637	-0.0750948	-0.0209607	-0.0288423	71.894
524	4.3725e-10	1.94386e-09	3.69613e-09	4.66736e-09	33.7514	1.00013	-0.0486709	-0.00248377	0.000781392	-0.0495238	-0.0478871	-0.00322934	72.738
525	4.37164e-10	1.94364e-09	3.69616e-09	4.66627e-09	33.7446	1.00013	-0.0478633	-0.00325194	0.00167344	-0.0503723	-0.0473946	-0.00369784	72.8051
526	4.37006e-10	1.94329e-09	3.69616e-09	4.66702e-09	33.7537	1.00011	-0.0469946	-0.0040783	0.00400764	-0.0525926	-0.0446989	-0.00626202	72.6925
527	4.37273e-10	1.94392e-09	3.69612e-09	4.66765e-09	33.7533	1.00013	-0.0488859	-0.00227928	0.000598107	-0.0493494	-0.0478961	-0.00322078	72.7373
528	4.3725e-10	1.94386e-09	3.69613e-09	4.66736e-09	33.7514	1.00013	-0.0469094	-0.00415936	0.00257533	-0.0512302	-0.0461974	-0.00483659	72.7016
529	4.3725e-10	1.94386e-09	3.69613e-09	4.66736e-09	33.7514	1.00013	-0.0485244	-0.00262316	-0.00118927	-0.0476492	-0.0504279	-0.00081245	72.6781
530	4.3725e-10	1.94386e-09	3.69613e-09	4.66736e-09	33.7514	1.00013	-0.048758	-0.00240094	0.000970469	-0.0497036	-0.0479762	-0.00314463	72.7358
531	4.3725e-10	1.94386e-09	3.69613e-09	4.66736e-09	33.7514	1.00013	-0.0497149	-0.00149073	-0.00013607	-0.0486511	-0.0461072	-0.00492245	72.7223
532	4.37687e-10	1.94386e-09	3.69613e-09	4.66736e-09	33.7514	1.00013	-0.0472646	-0.00382151	0.00219632	-0.0508697	-0.0465726	-0.00447976	72.6861
533	4.3725e-10	1.94581e-09	3.69613e-09	4.66736e-09	33.7514	1.00013	-0.0484821	-0.0026634	-0.0009982	-0.047831	-0.0499216	-0.00129412	72.7099
534	4.3725e-10	1.94386e-09	3.69982e-09	4.66736e-09	33.7514	1.00013	-0.0486645	-0.00248988	0.000769201	-0.0495122	-0.0478808	-0.00323534	72.7381
535	4.3725e-10	1.94386e-09	3.69613e-09	4.67203e-09	33.7514	1.00013	-0.0495379	-0.00165903	3.3901e-05	-0.0488127	-0.0464305	-0.00461488	72.7258
536	4.3725e-10	1.94386e-09	3.69613e-09	4.66736e-09	33.7852	1.00013	-0.0497196	-0.00148624	-0.000217856	-0.0485733	-0.048935	-0.00223253	72.738
537	4.3725e-10	1.94386e-09	3.69613e-09	4.66736e-09	33.7514	1.00113	-0.0486126	-0.00253923	0.000836896	-0.0495766	-0.0478289	-0.00328468	72.7339
538	4.36994e-10	1.94349e-09	3.69615e-09	4.66567e-09	33.7453	1.00013	-0.0455466	-0.00545569	0.00417276	-0.0527497	-0.0441682	-0.00676687	72.7393
539	4.36675e-10	1.94335e-09	3.69613e-09	4.66862e-09	33.7795	1.0001	-0.0394643	-0.0112413	0.0113618	-0.059588	-0.0342103	-0.0162389	72.3477
540	4.37199e-10	1.94379e-09	3.69613e-09	4.66703e-09	33.7502	1.00013	-0.0483383	-0.00280015	0.0011777	-0.0499007	-0.0474356	-0.00365886	72.7384
541	4.37212e-10	1.94381e-09	3.69613e-09	4.66711e-09	33.7505	1.00013	-0.0484383	-0.00270504	0.00106177	-0.0497905	-0.0475663	-0.00353452	72.7383
542	4.37224e-10	1.94382e-09	3.69613e-09	4.66719e-09	33.7508	1.00013	-0.0485192	-0.00262809	0.000966319	-0.0496997	-0.0476746	-0.00343148	72.7382
543	4.37199e-10	1.94379e-09	3.69613e-09	4.66703e-09	33.7502	1.00013	-0.0483383	-0.00280015	0.0011777	-0.0499007	-0.0474356	-0.00365886	72.7384
